# Supplementary material for: Lethal Mutagenesis of Hepatitis C Virus Induced by Favipiravir
Source: PubMed Central journal article supplement (PMC5068784; doi:10.1371/journal.pone.0164691), 2016-10-18

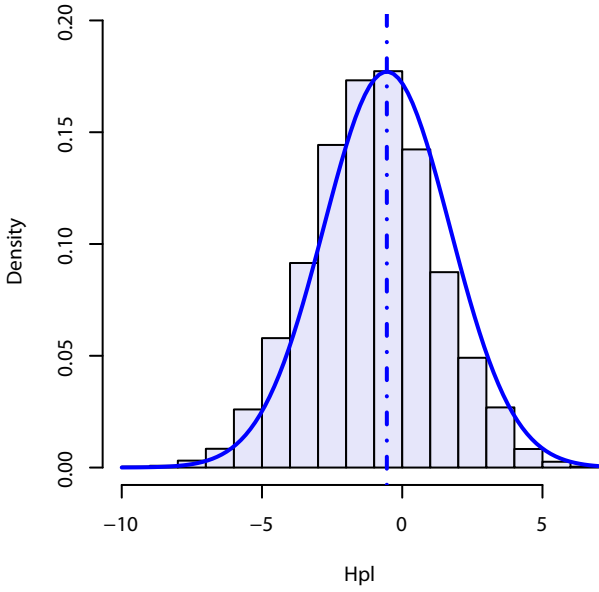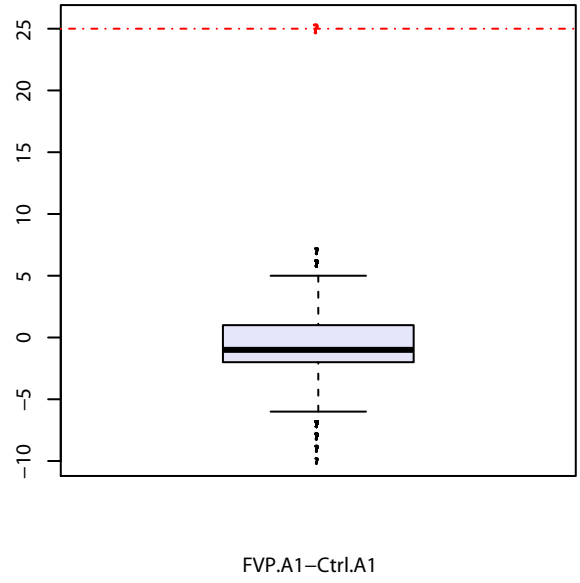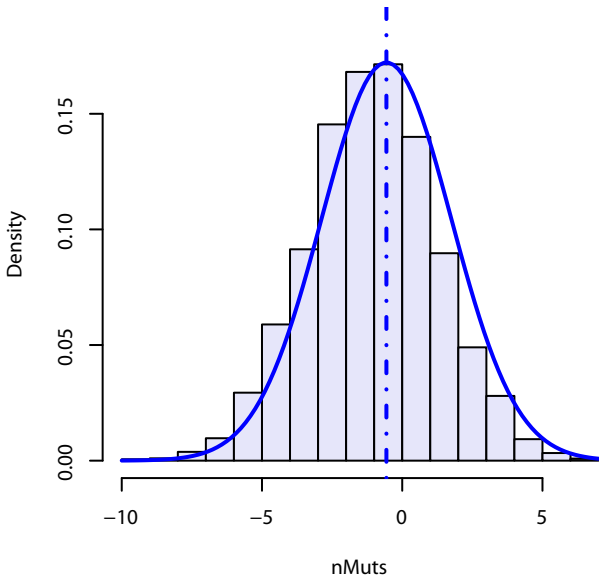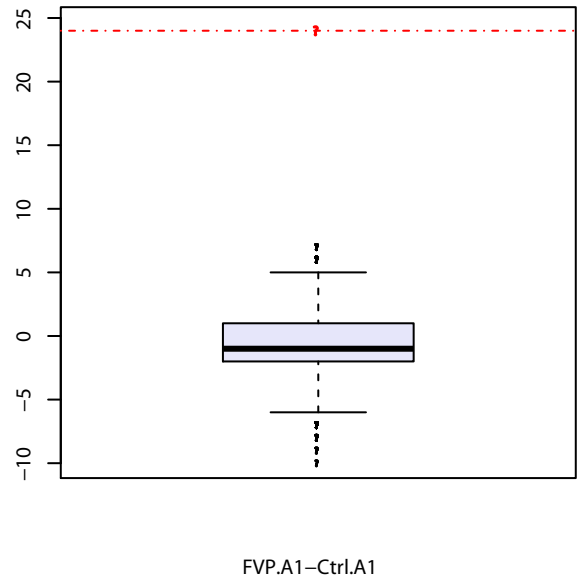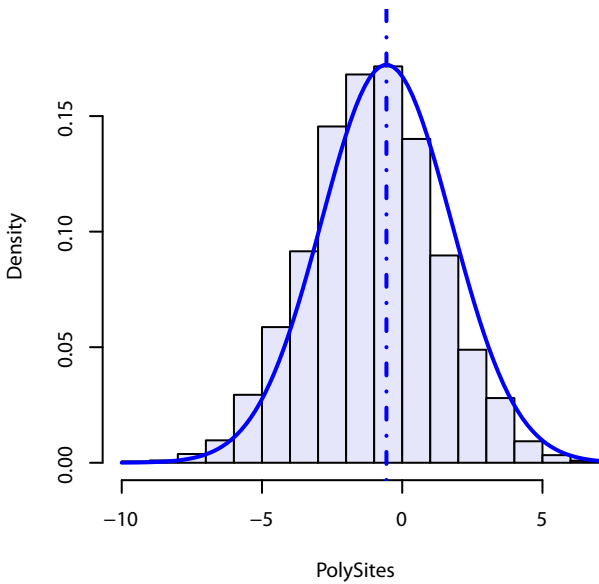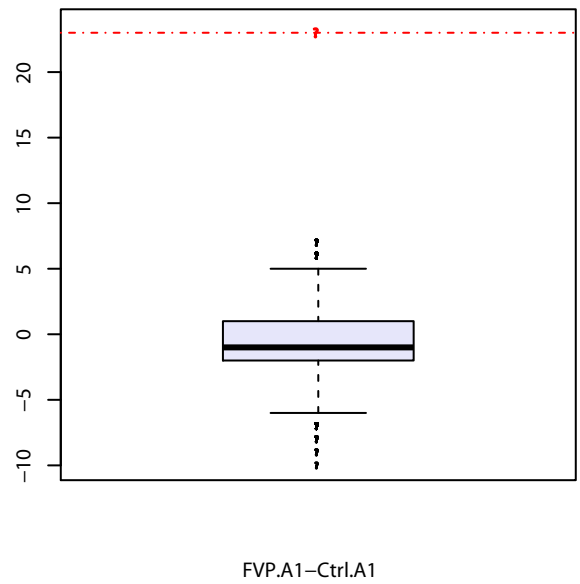

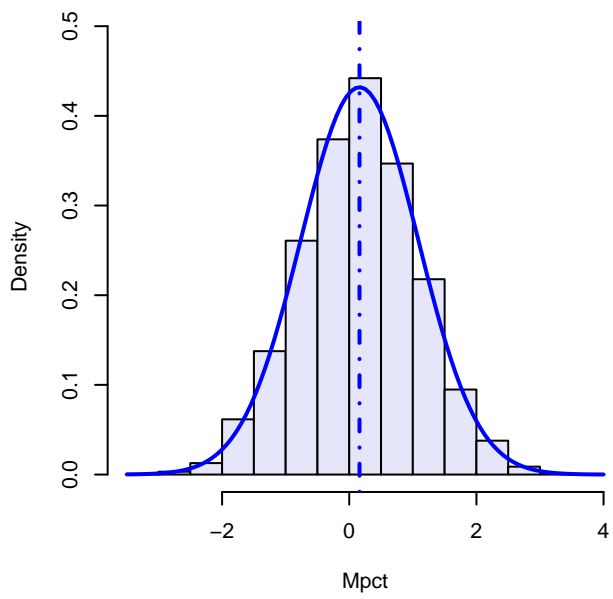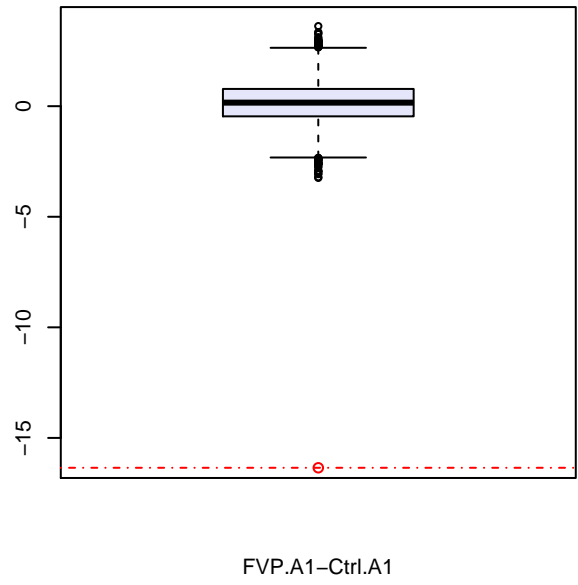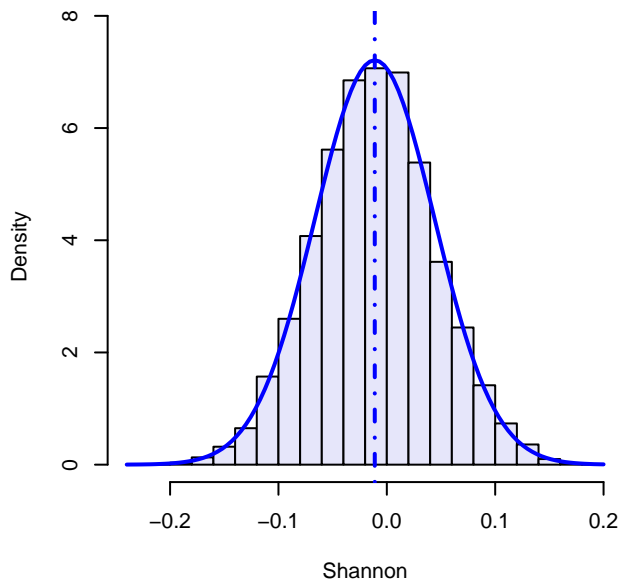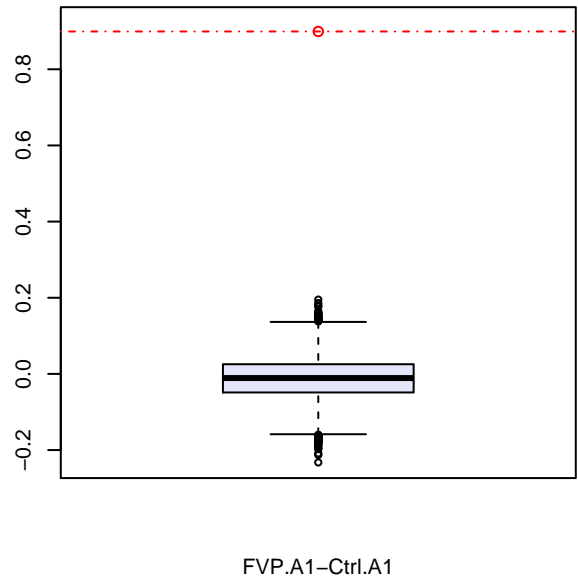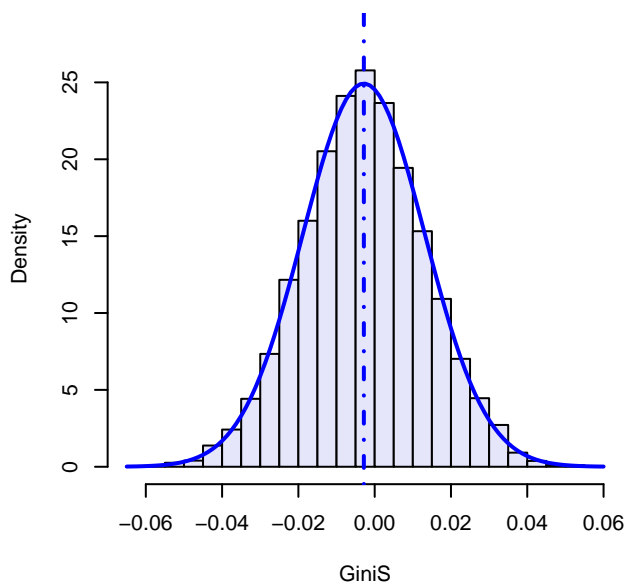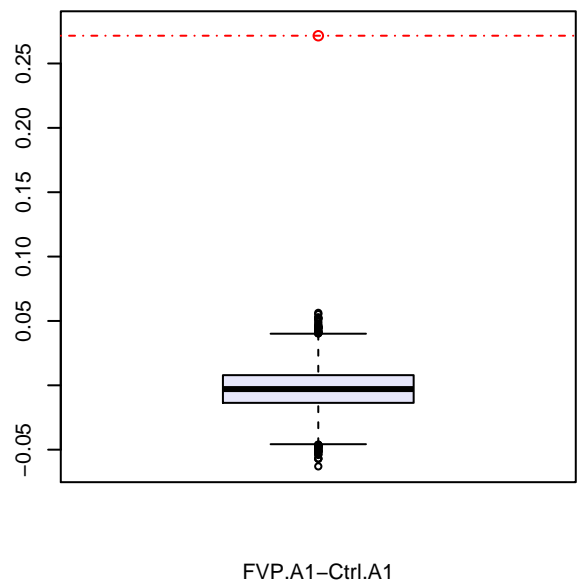

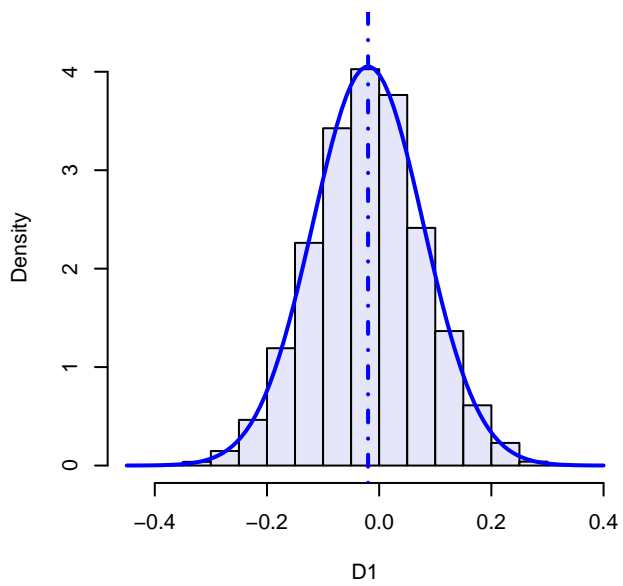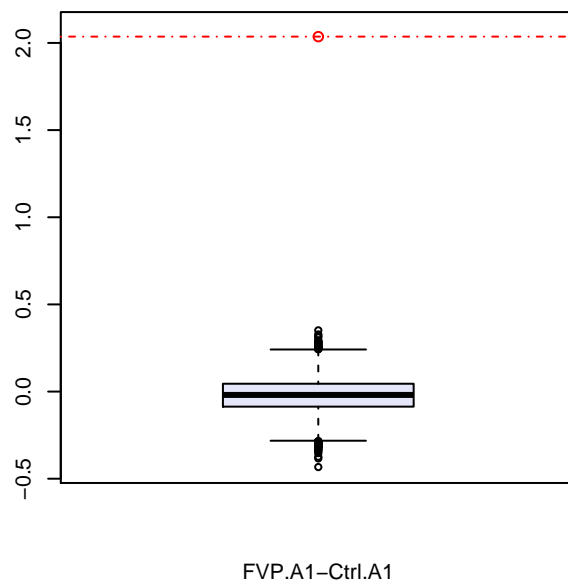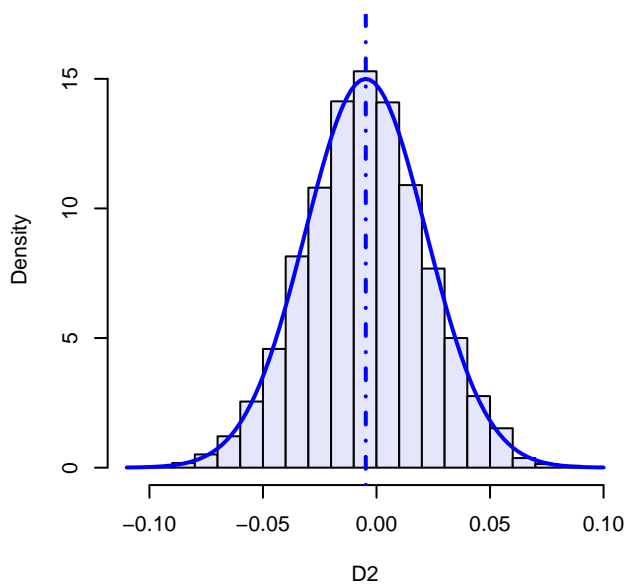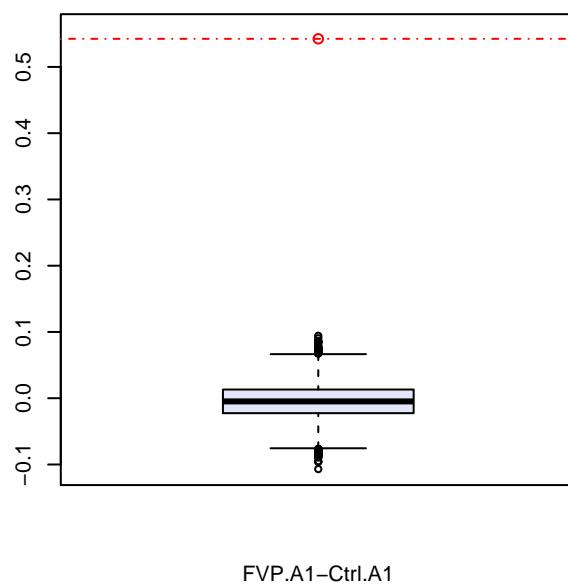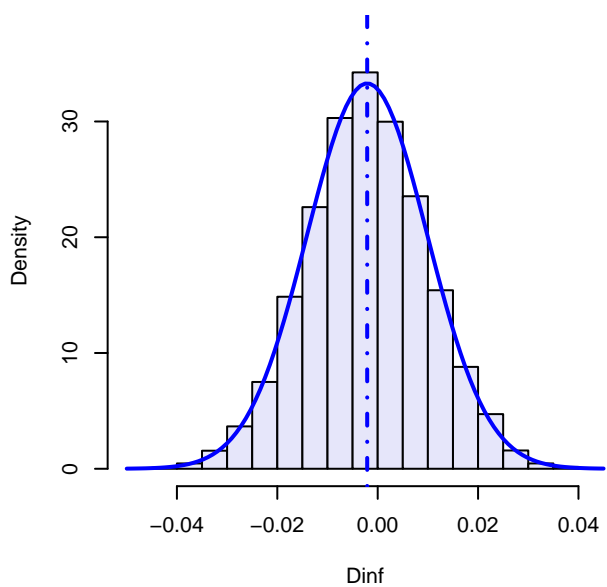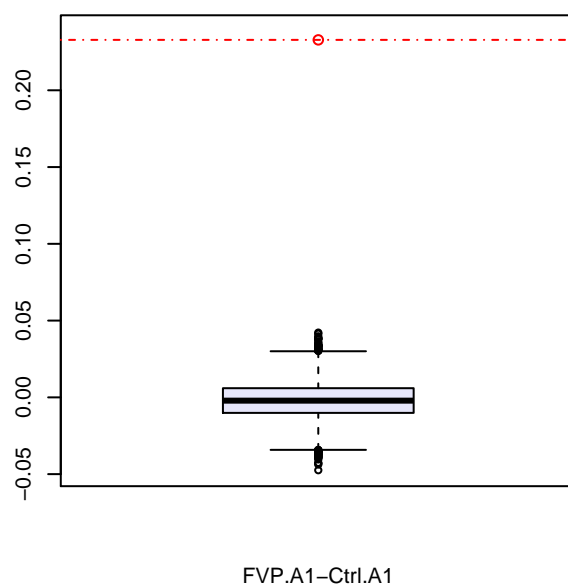

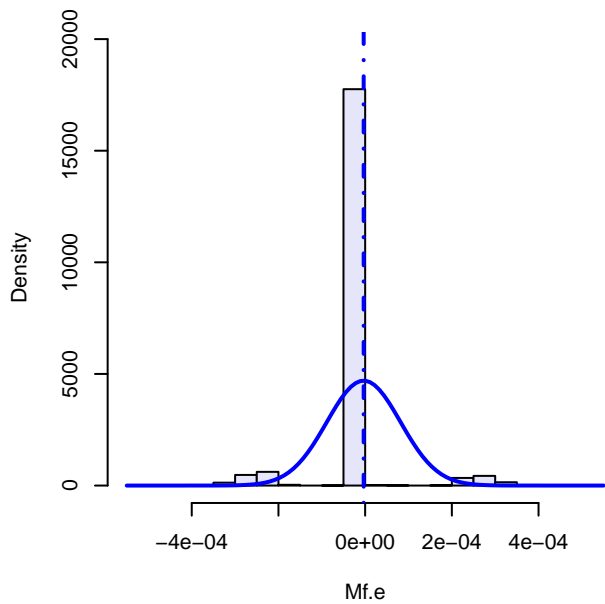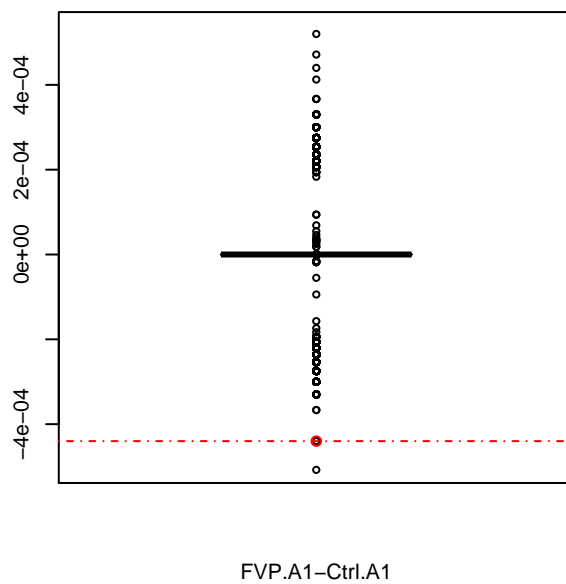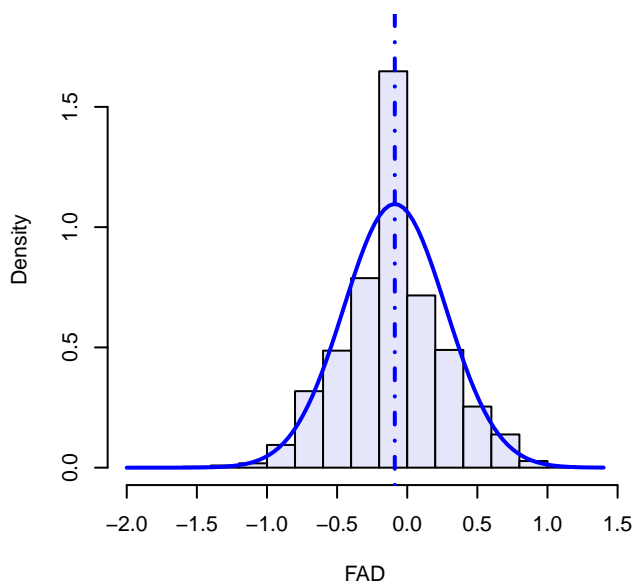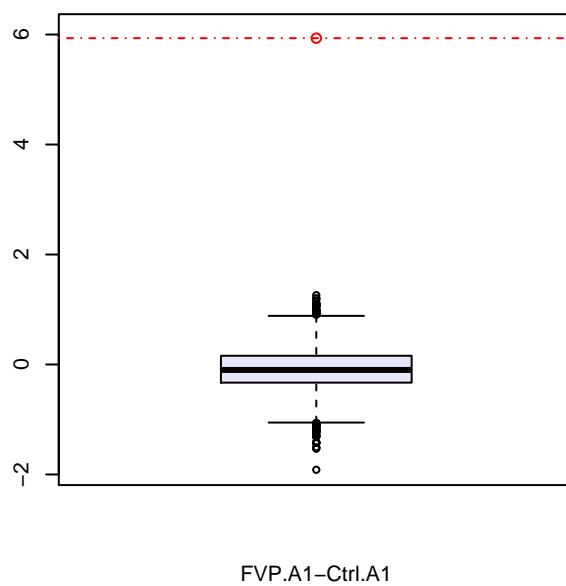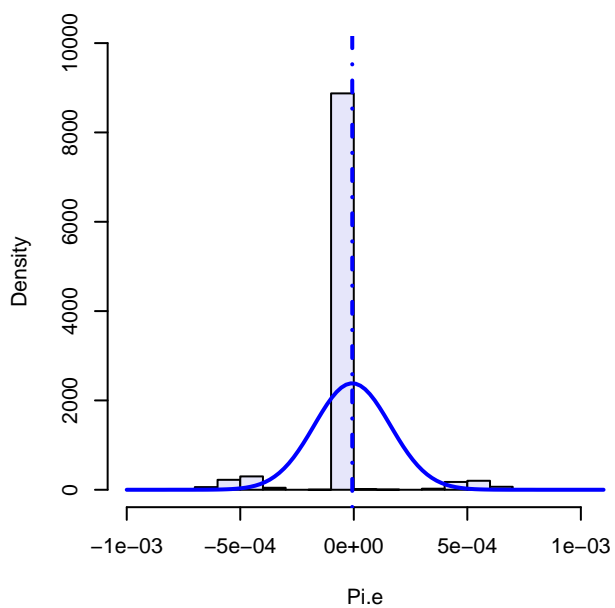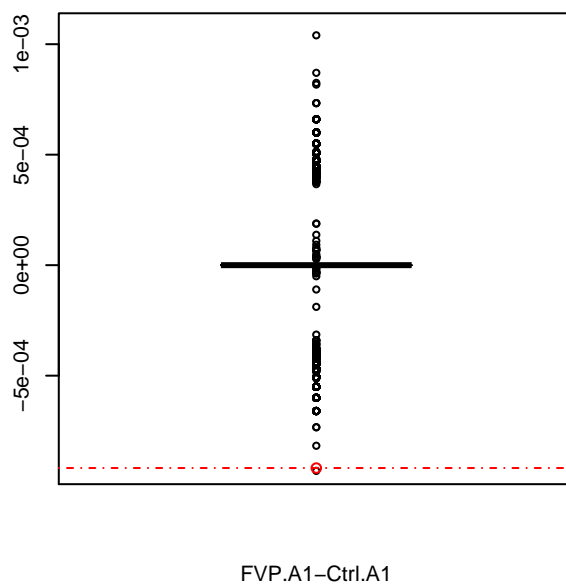

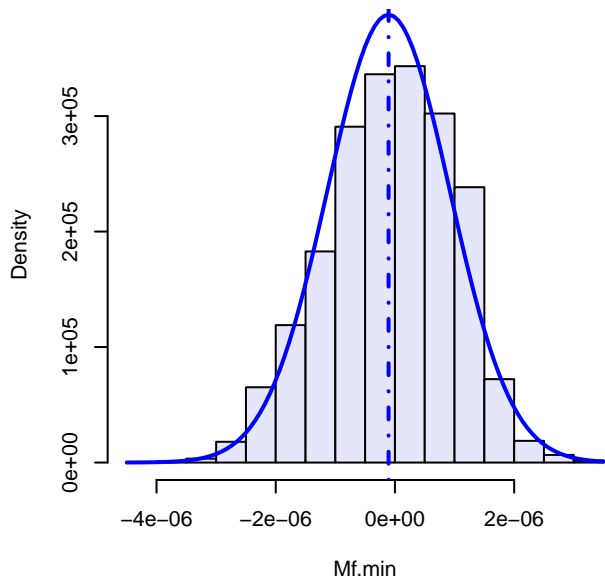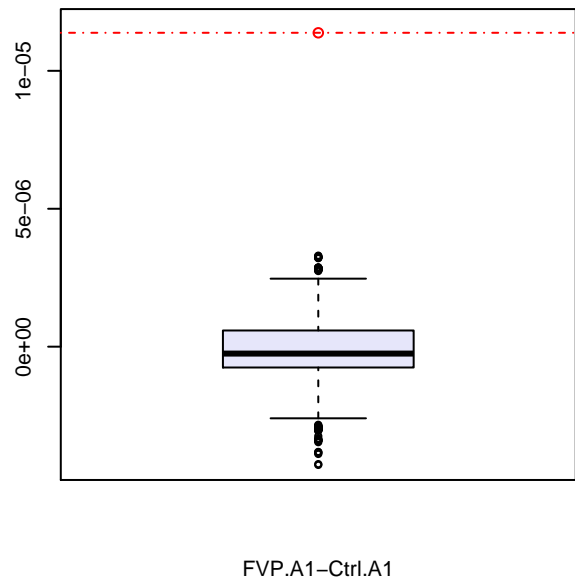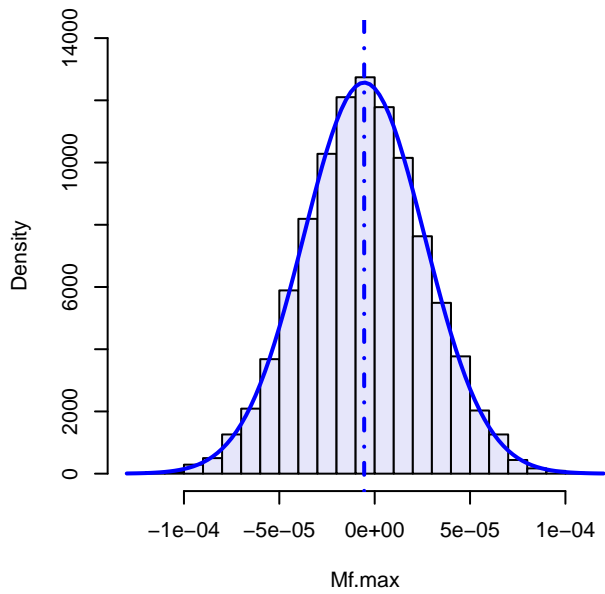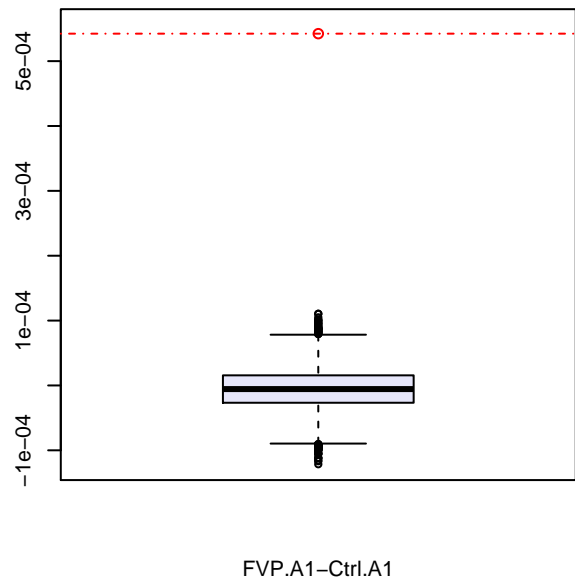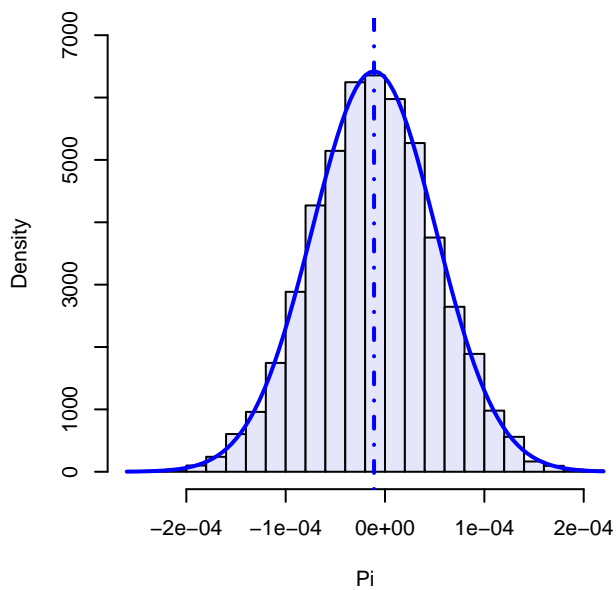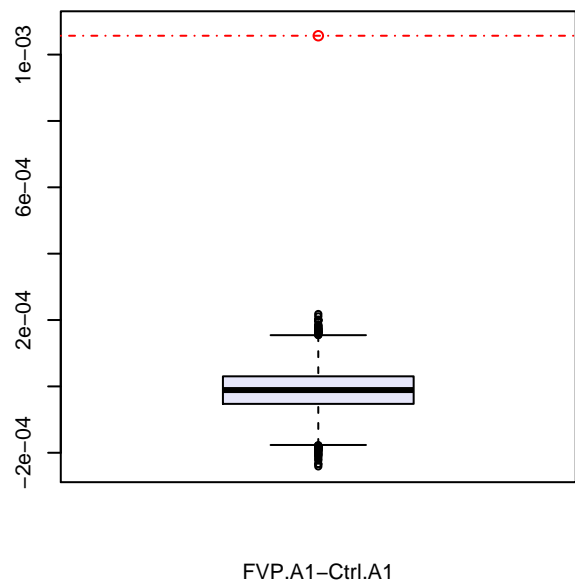

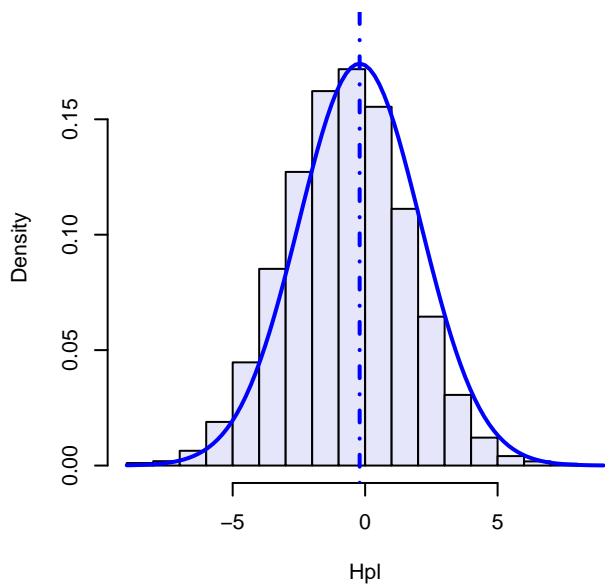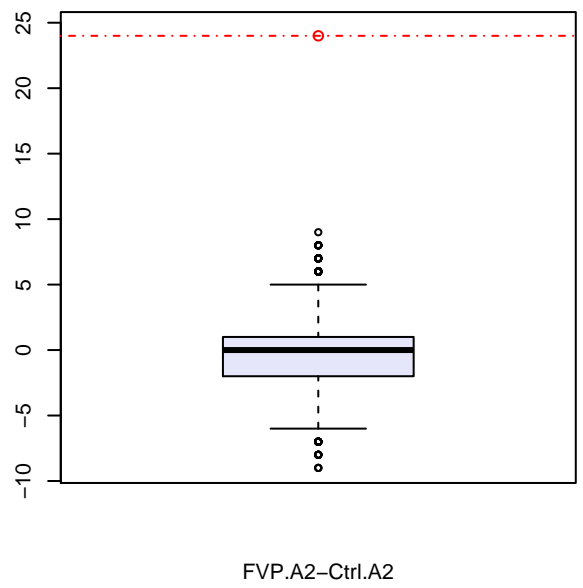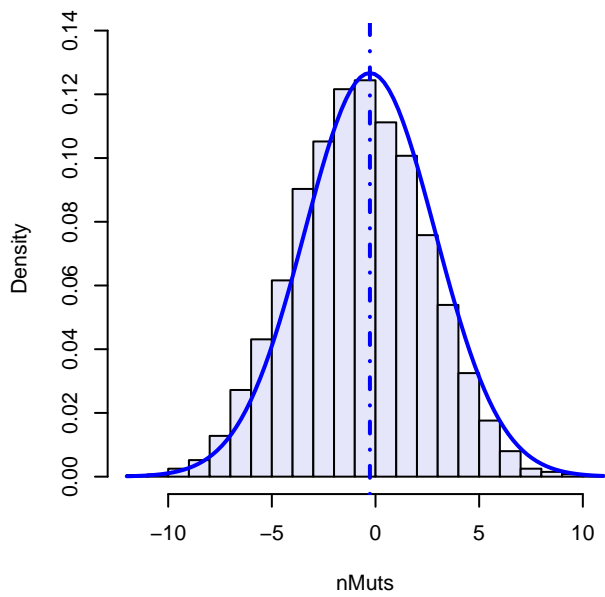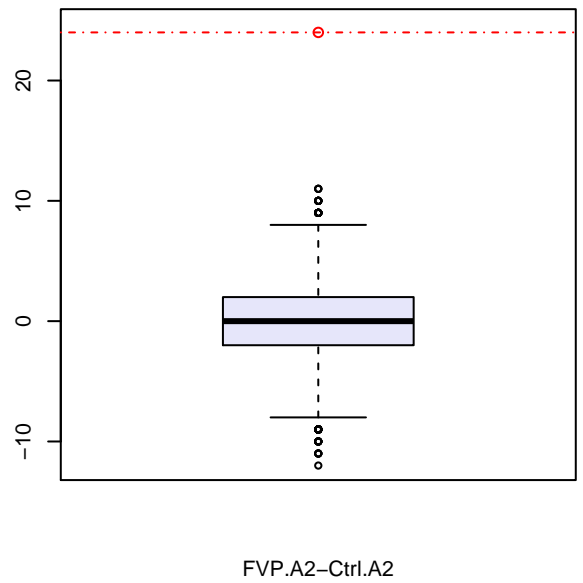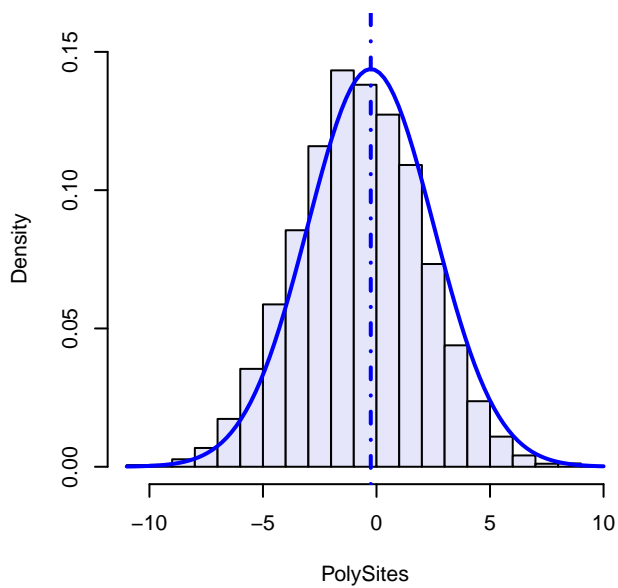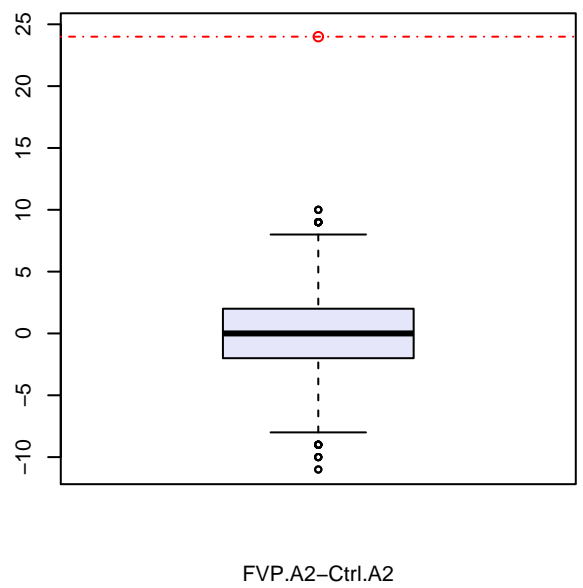

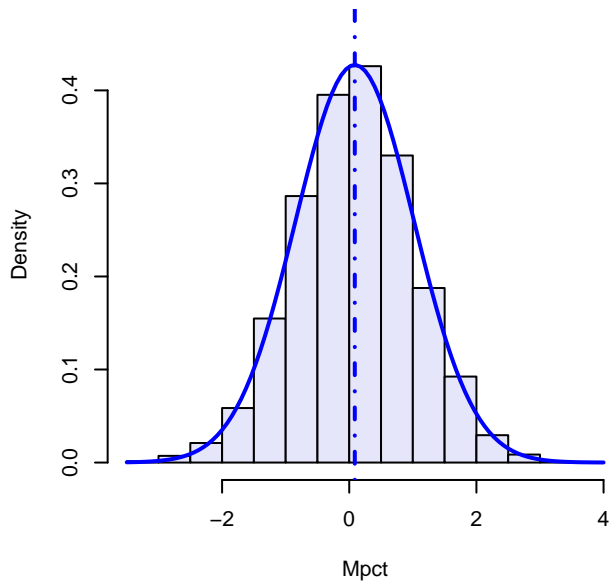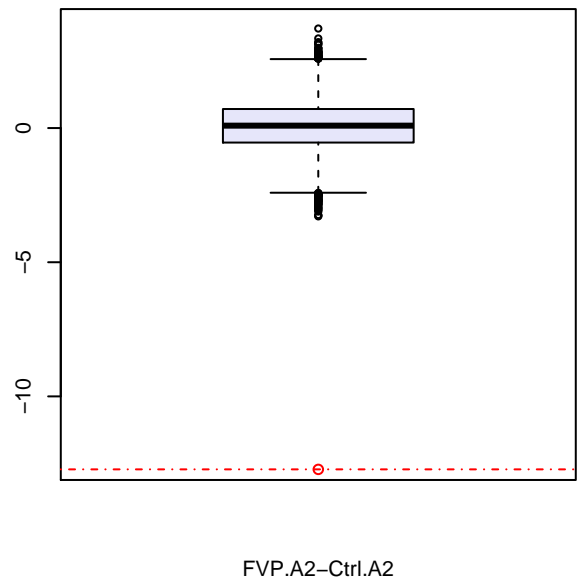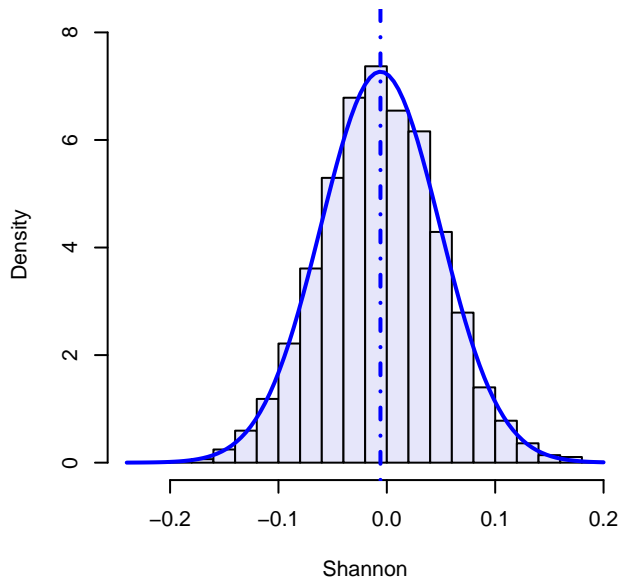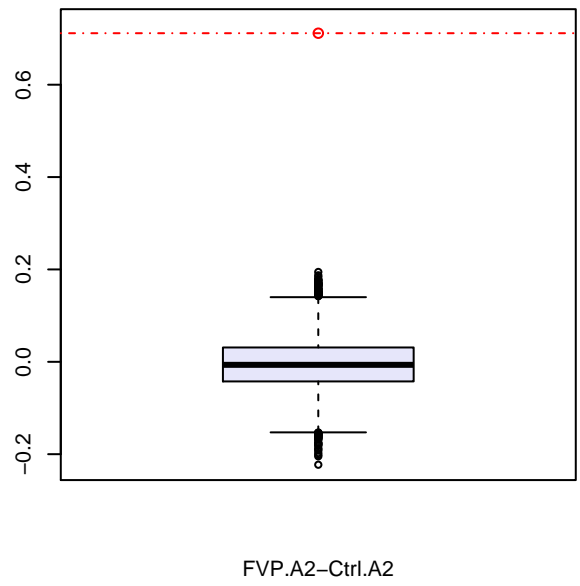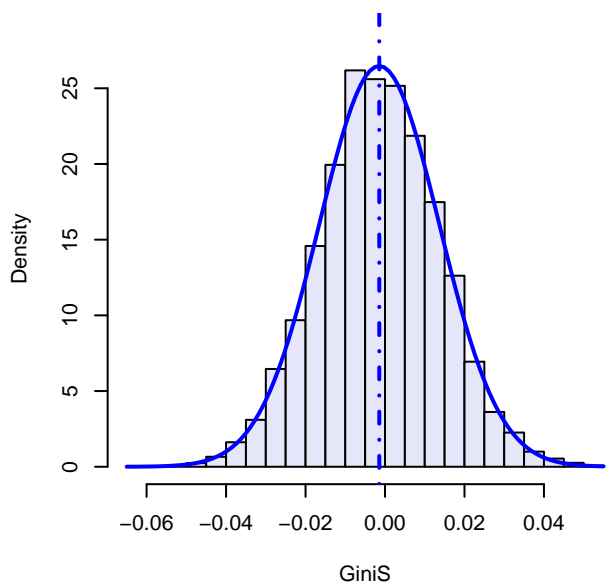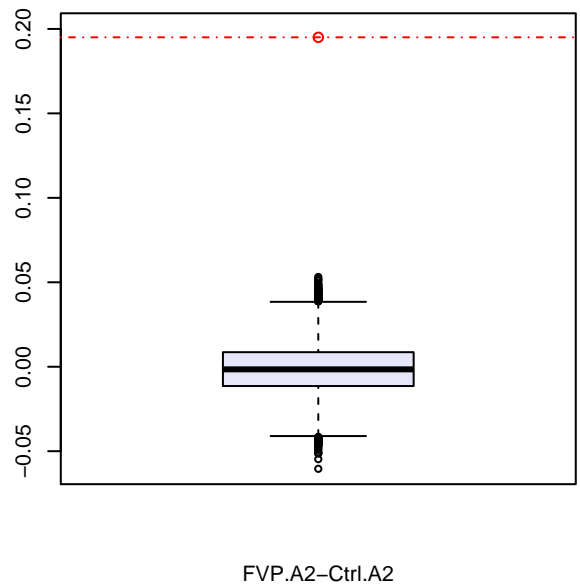

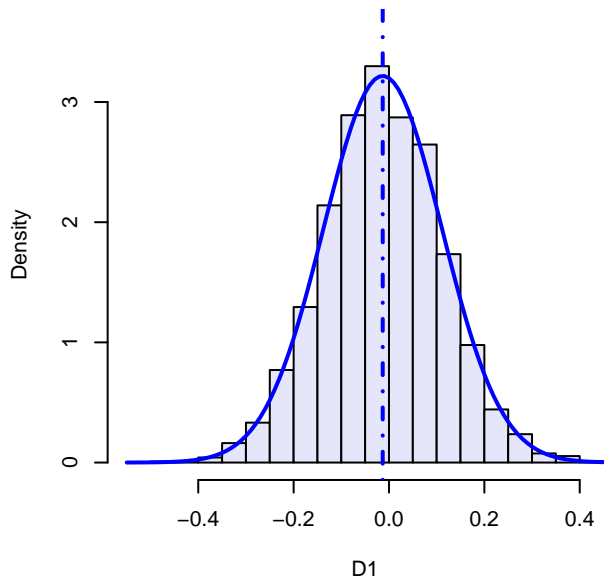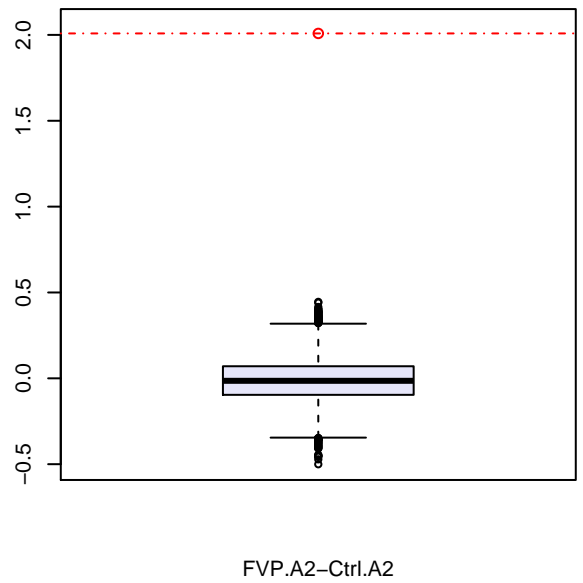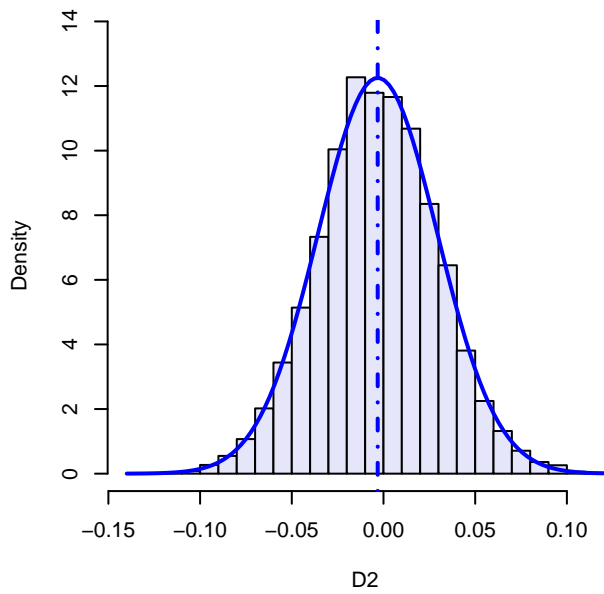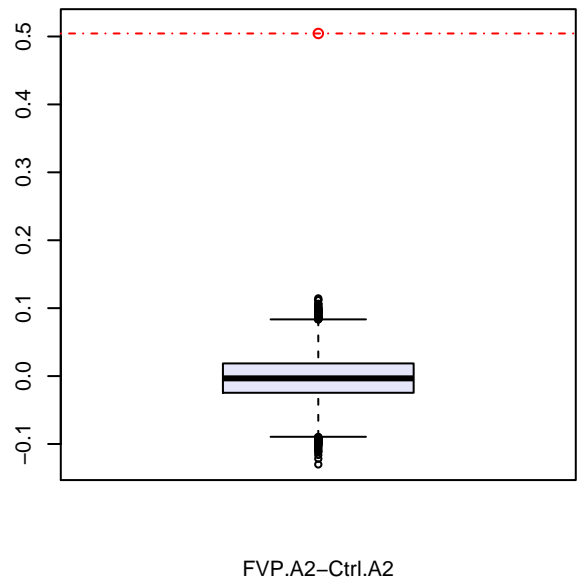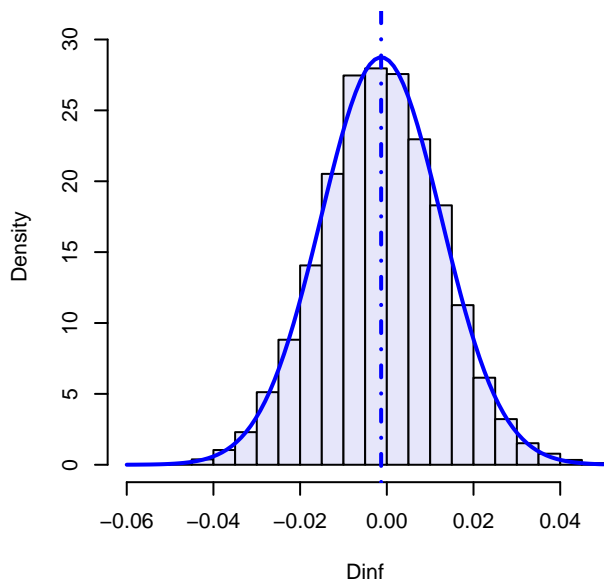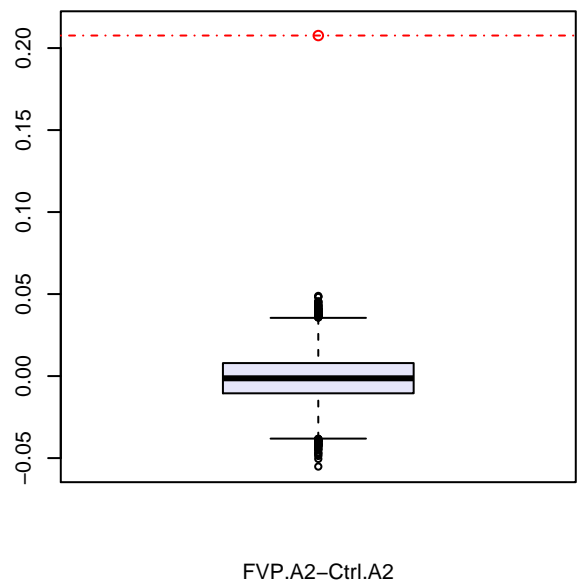



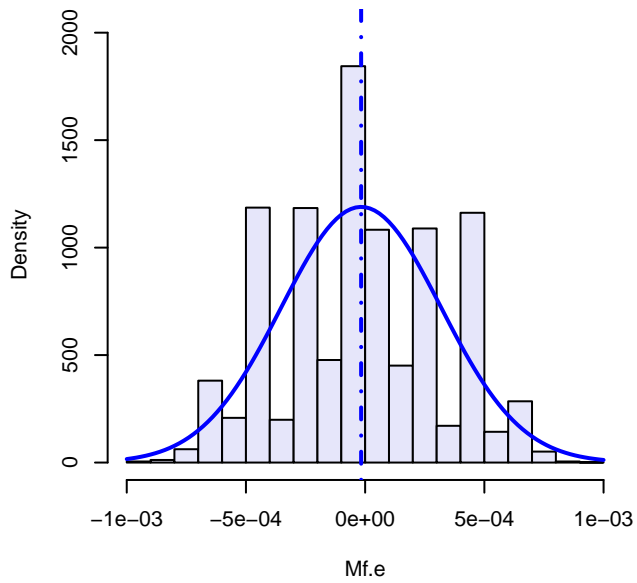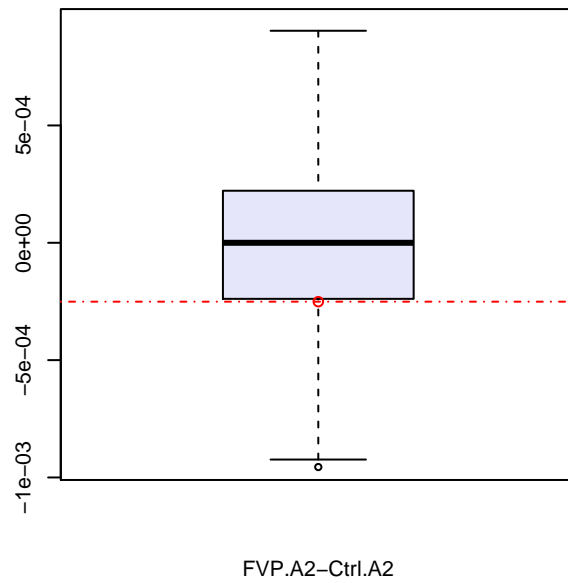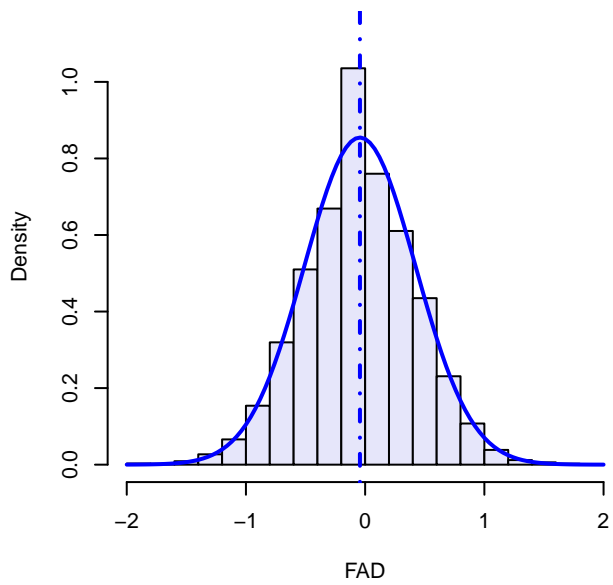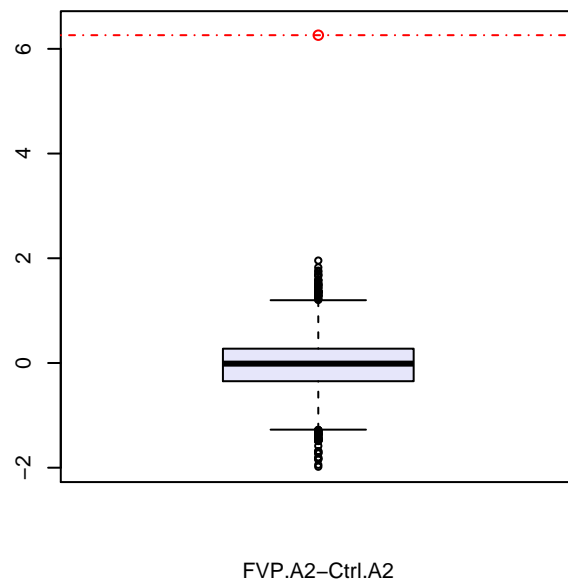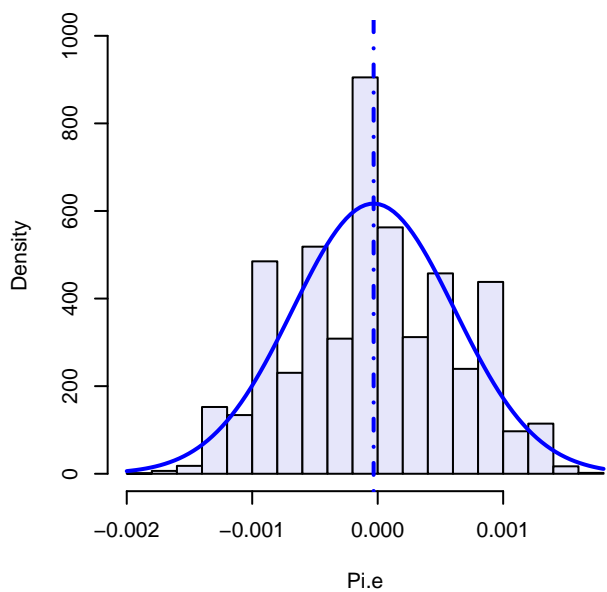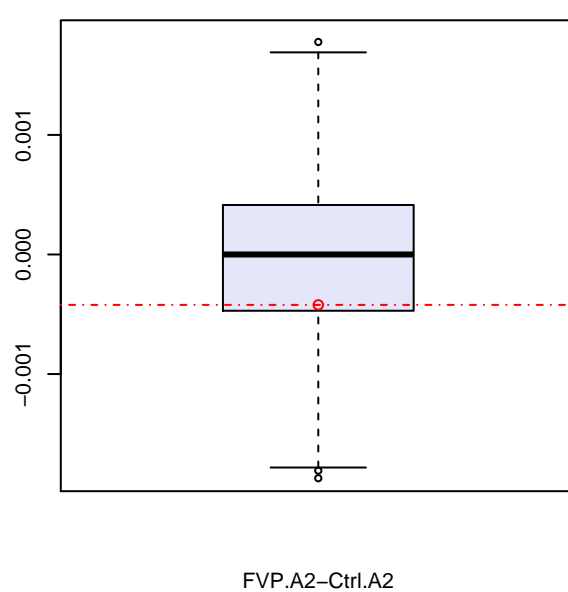

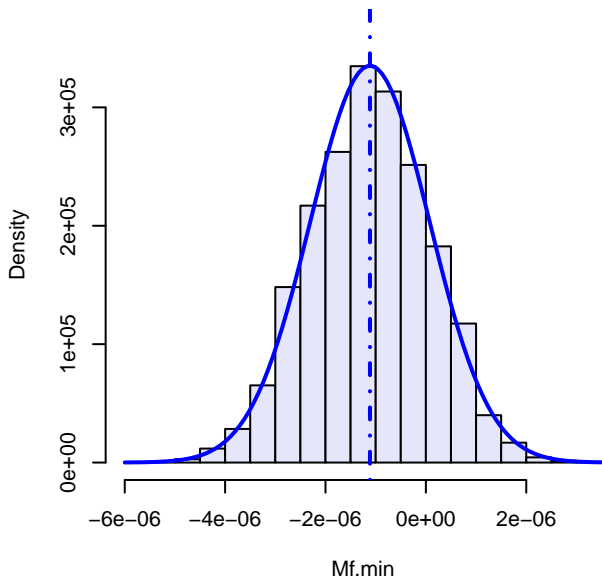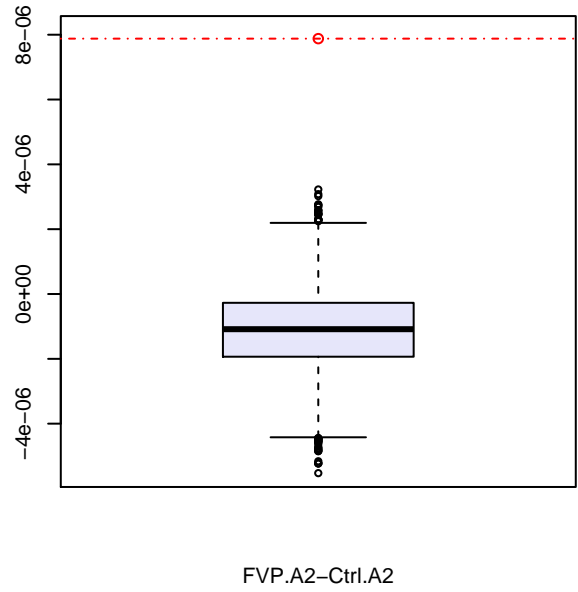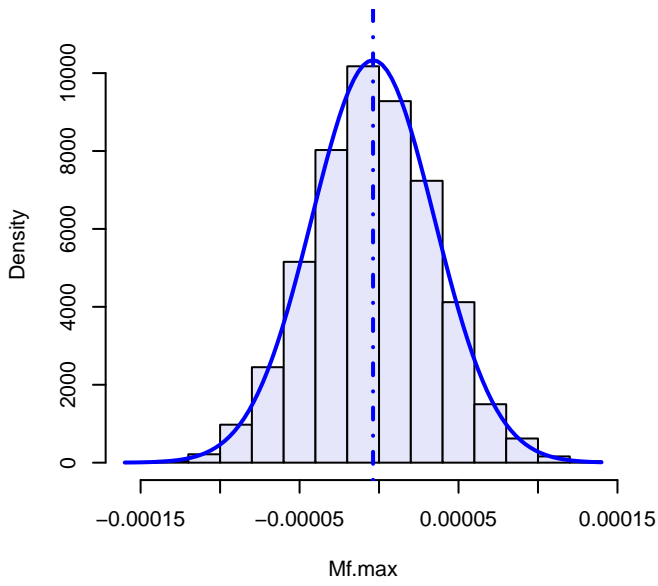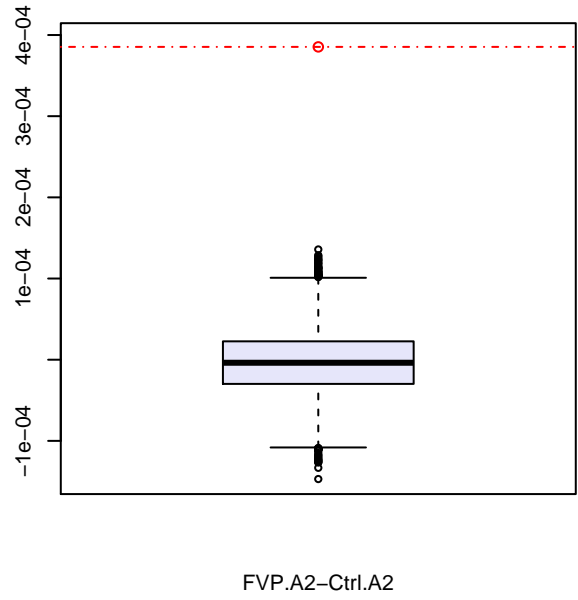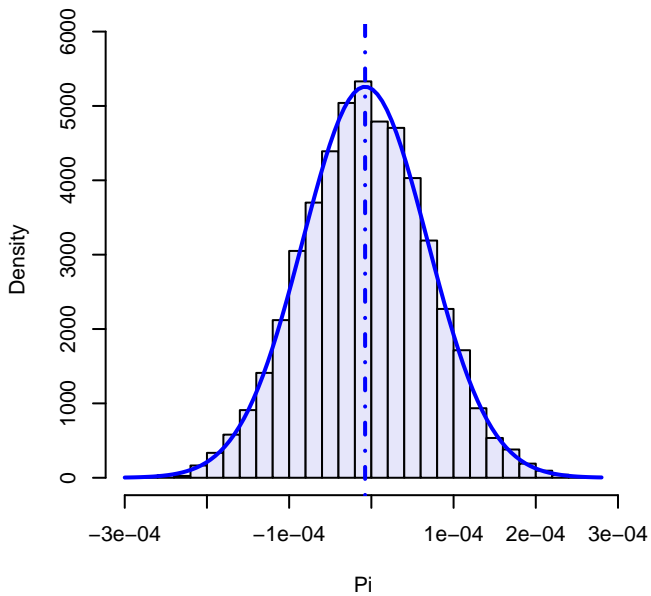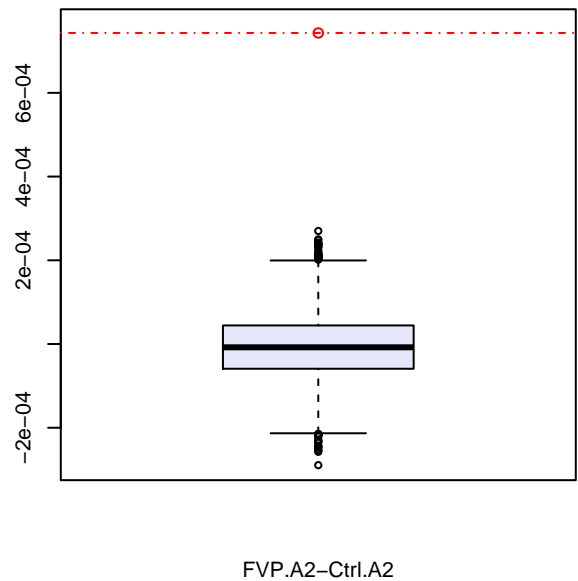

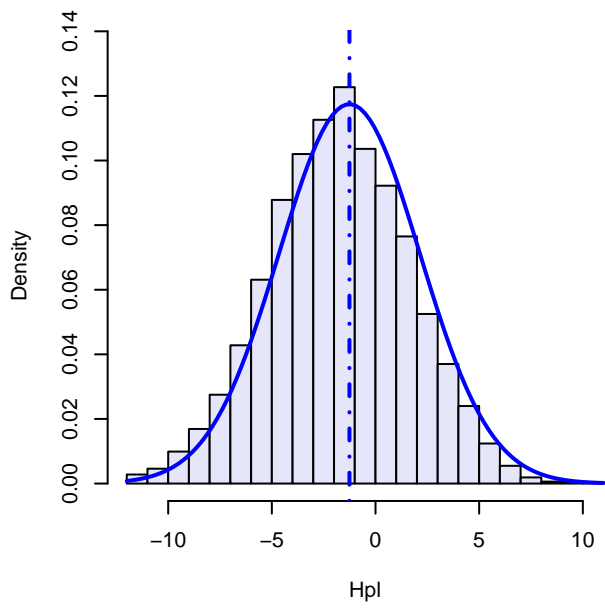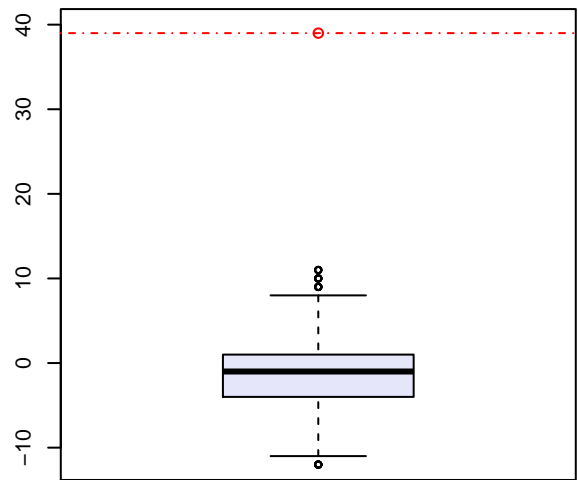

FVP.A4-Ctrl.A4

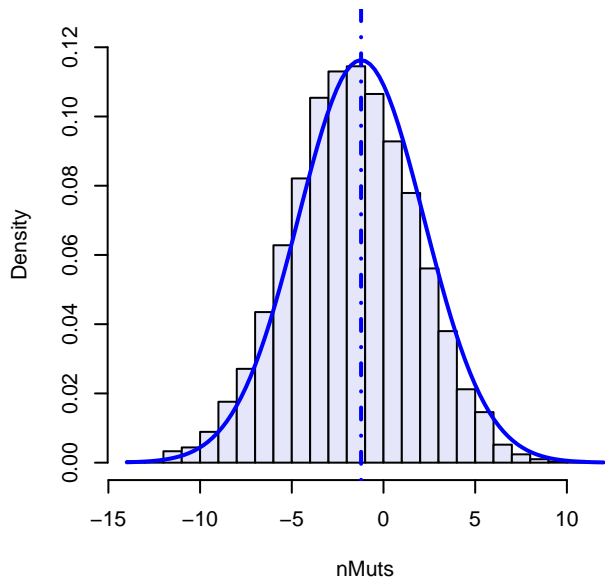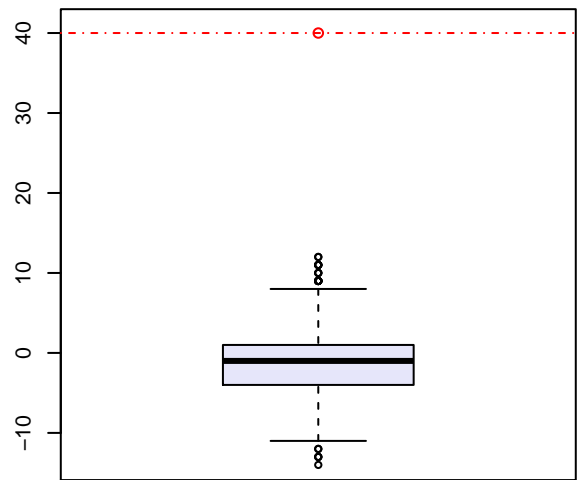

FVP.A4-Ctrl.A4

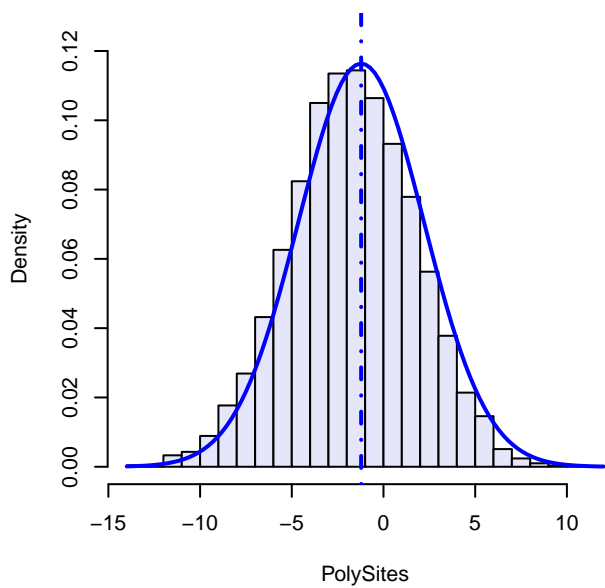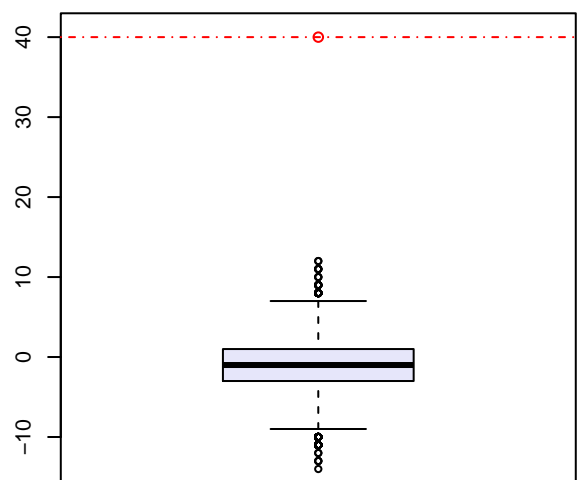

FVP.A4-Ctrl.A4

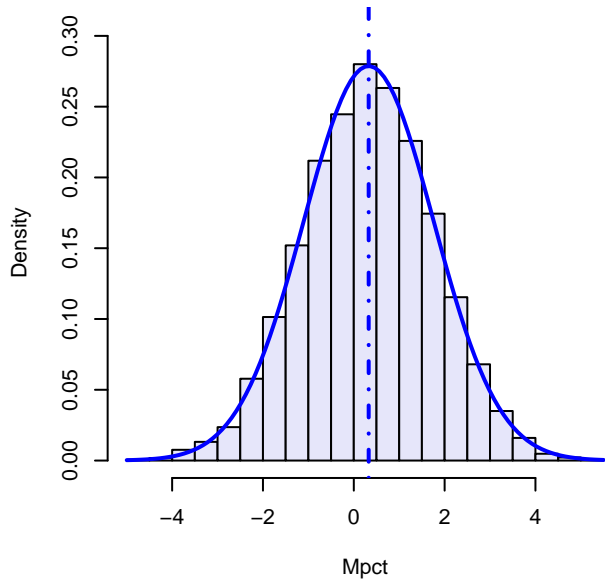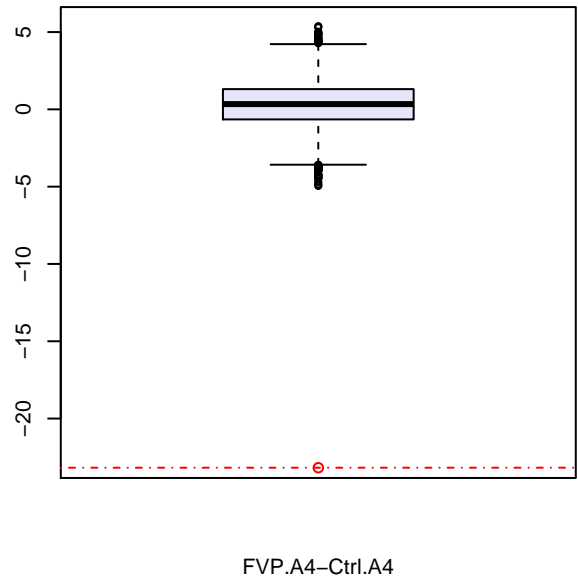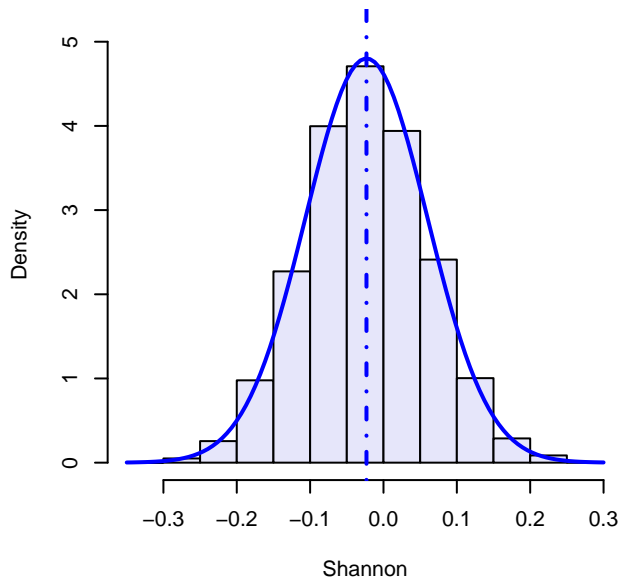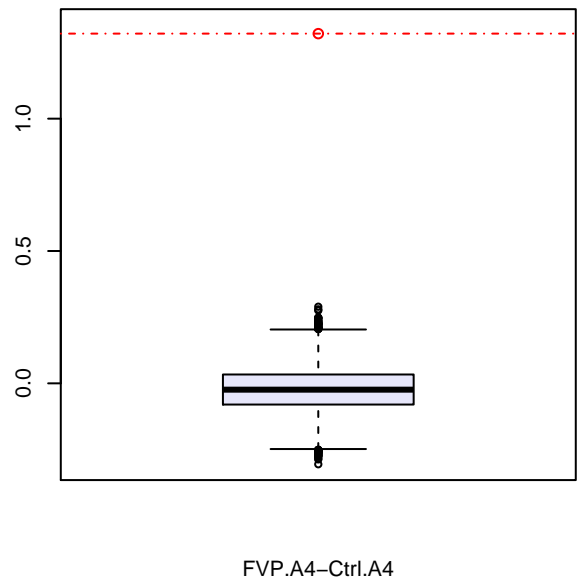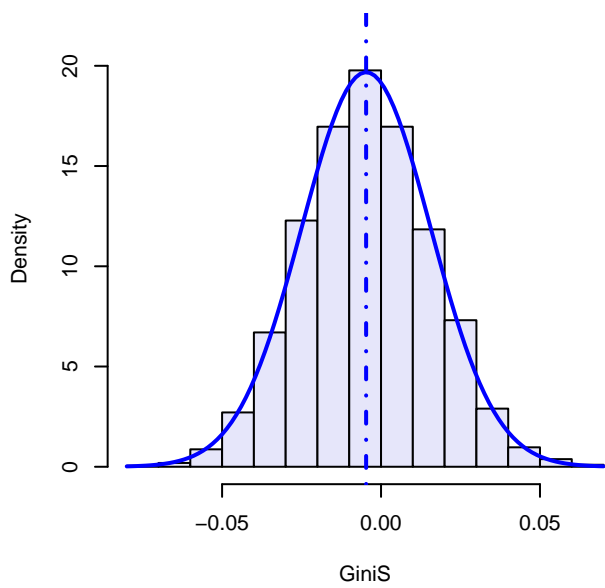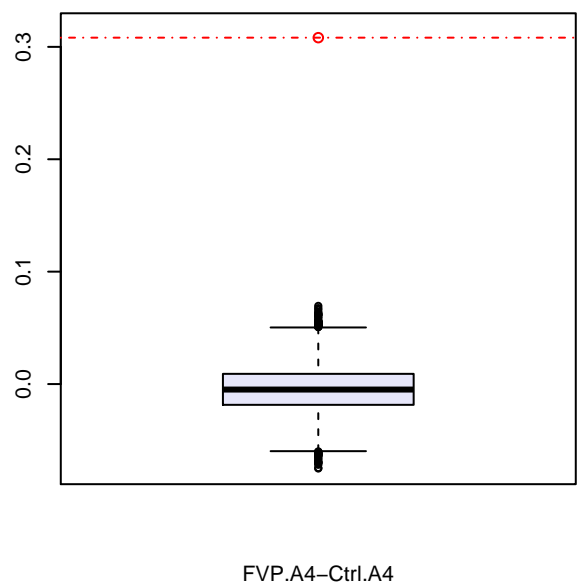

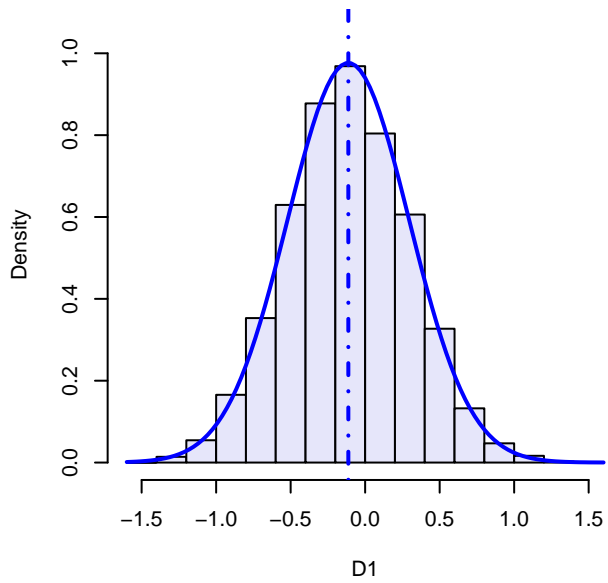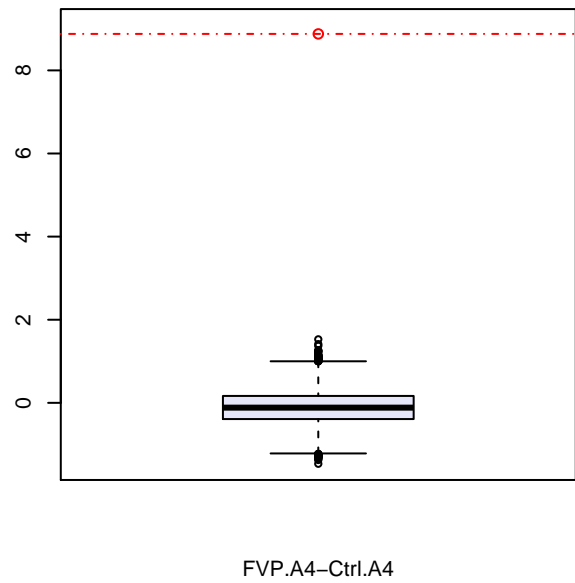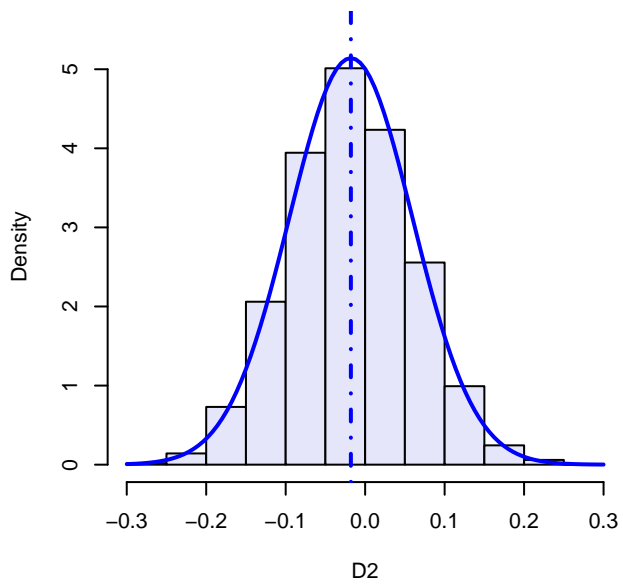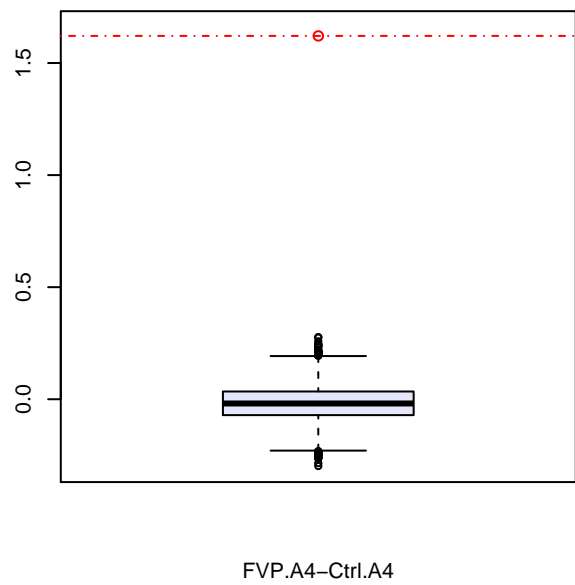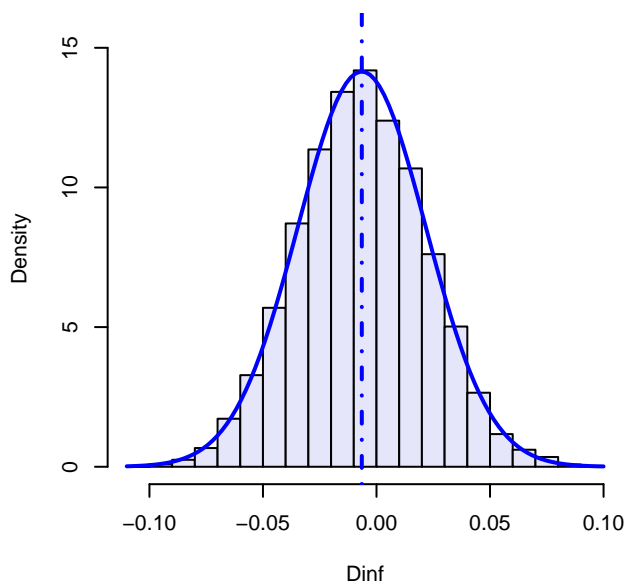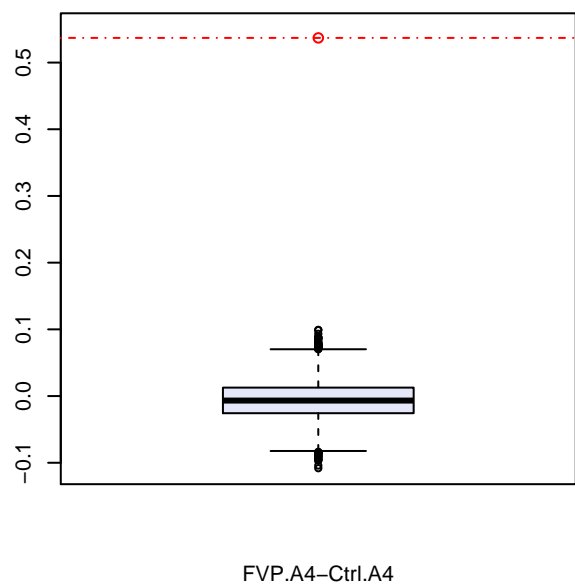

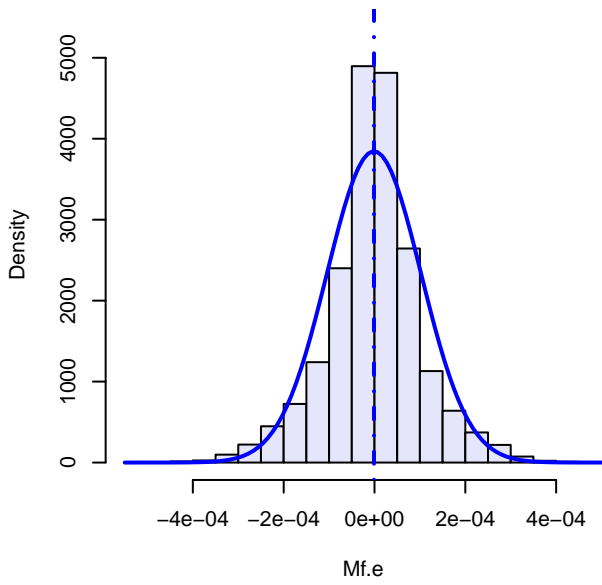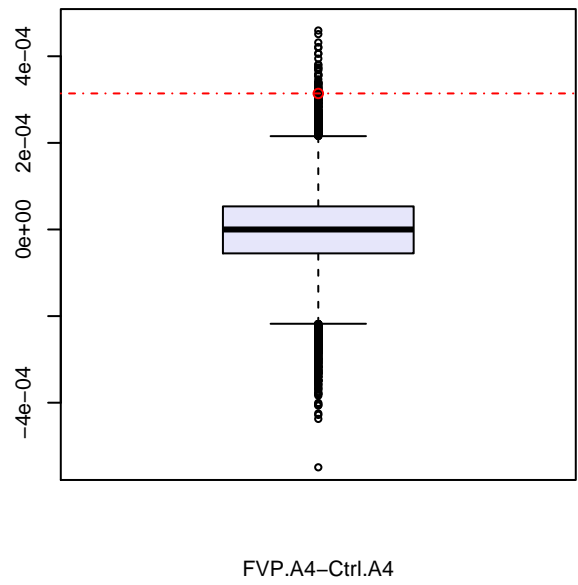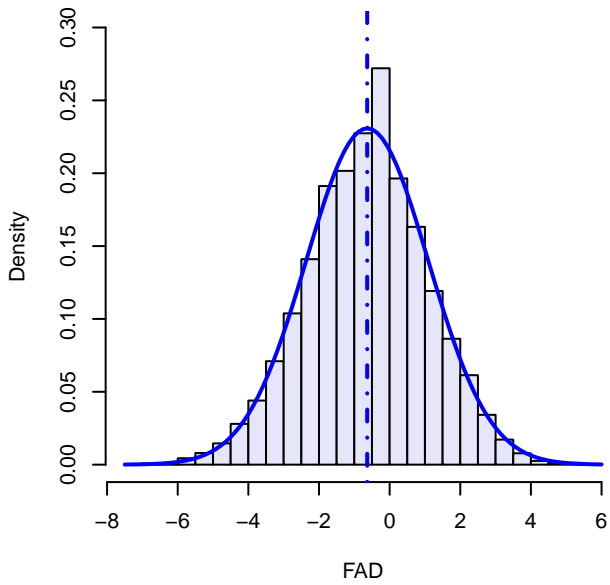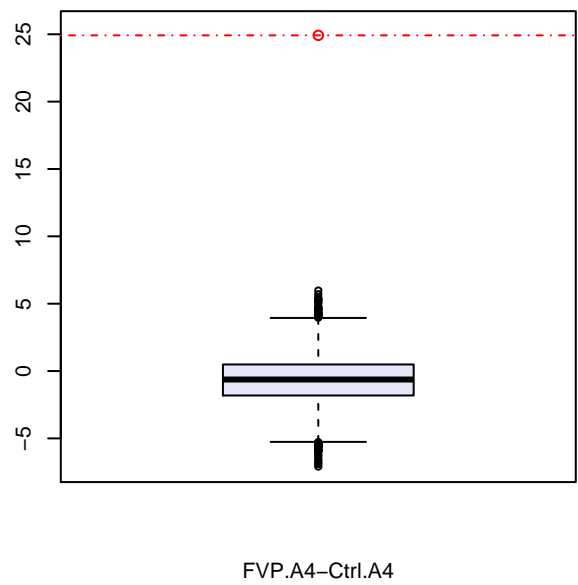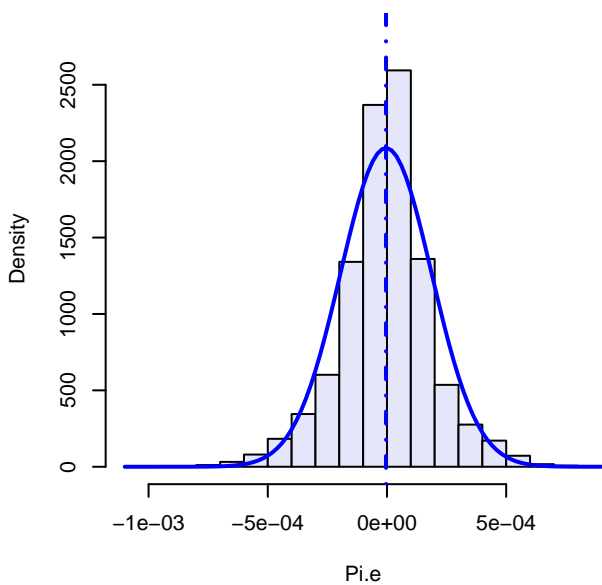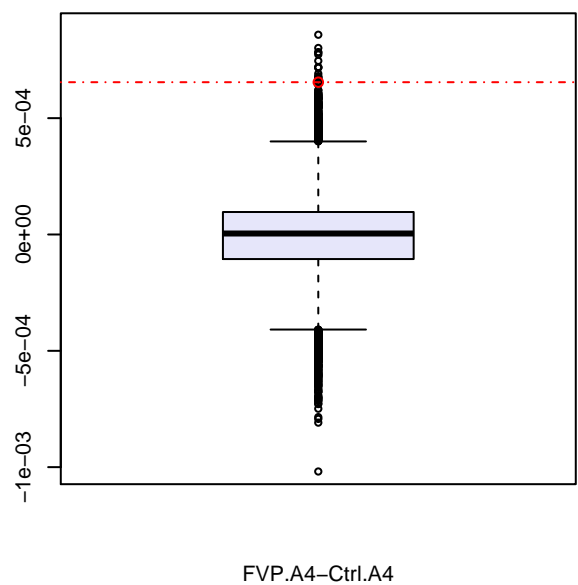

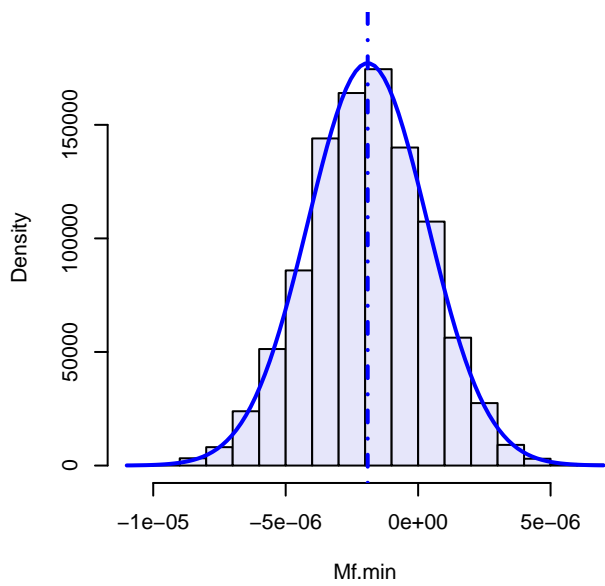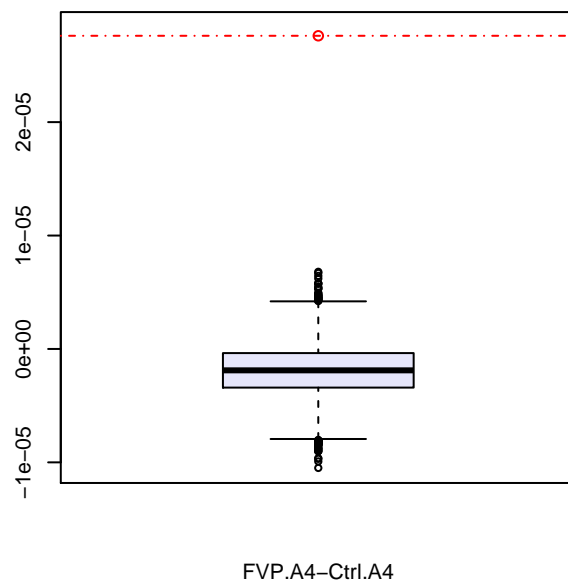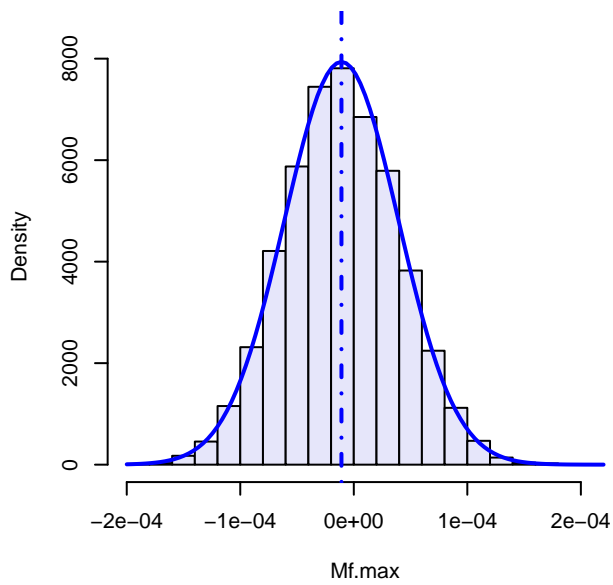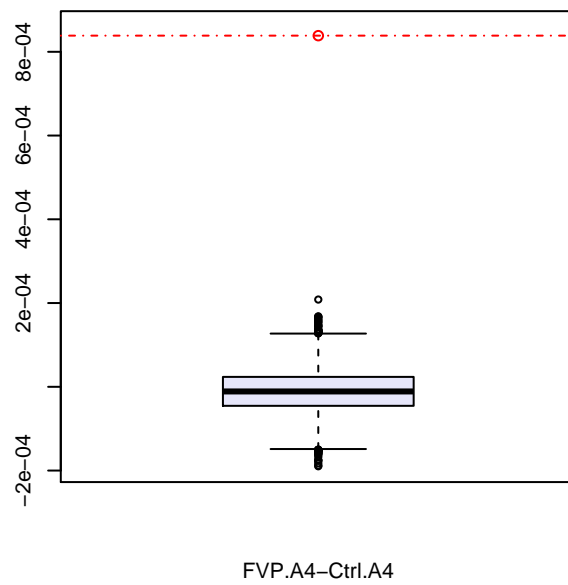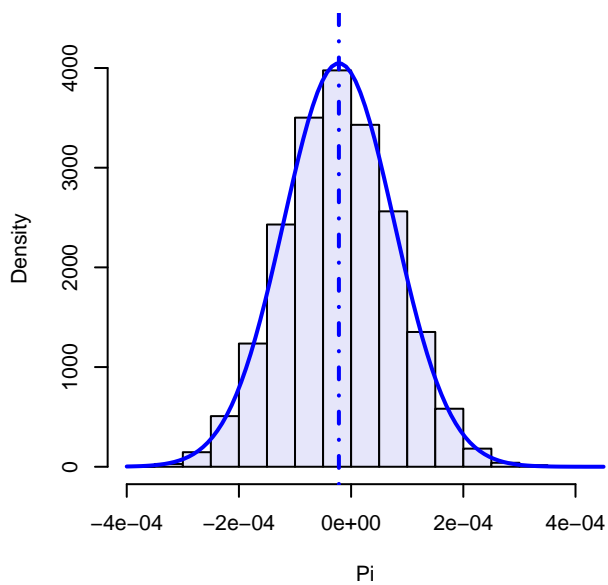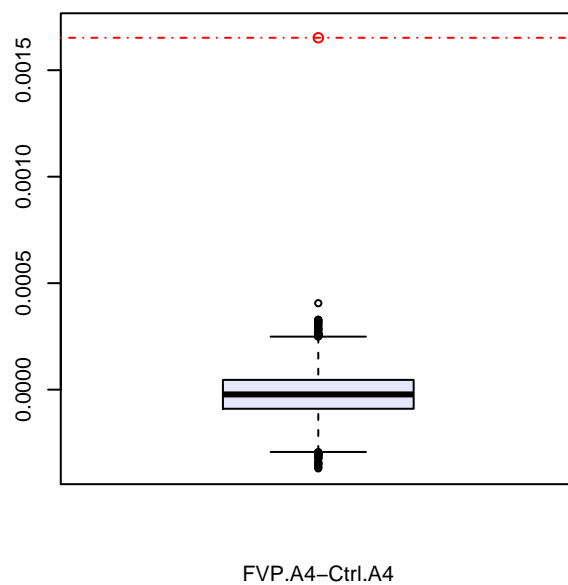

Supplement: pone.0164691.s002.pdf [file pone.0164691.s002.pdf]
