# Supplementary material for: Lethal Mutagenesis of Hepatitis C Virus Induced by Favipiravir
Source: PubMed Central journal article supplement (PMC5068784; doi:10.1371/journal.pone.0164691), 2016-10-18
Supplement: pone.0164691.s005.pdf [file pone.0164691.s005.pdf]

**S2 Table.** Mutations, corresponding amino acid substitutions and point accepted mutation (PAM) of the NS5A-coding region in the mutant spectra HCV p0 subjected to three passages in the absence of drug analyzed by ultra deep pyrosequencing<sup>a</sup>.

| Amplicon A1                            |                                      |         | Amplicon A2                            |                                      |         | Amplicon A4                            |                                      |         |
|----------------------------------------|--------------------------------------|---------|----------------------------------------|--------------------------------------|---------|----------------------------------------|--------------------------------------|---------|
| Mutation <sup>b</sup>                  | Amino acid substitution <sup>c</sup> | PAM 250 | Mutation <sup>b</sup>                  | Amino acid Substitution <sup>c</sup> | PAM 250 | Mutation <sup>b</sup>                  | Amino acid Substitution <sup>c</sup> | PAM 250 |
| A6260G <sup>d</sup>                    | I259V <sup>d</sup>                   | 4       | A6452G                                 | N62D                                 | 2       | G6959U                                 | V231L                                | 2       |
| G6391A                                 | -                                    | -       | A6491G                                 | T75A                                 | 1       | U7016C                                 | Y250H                                | 0       |
| G6394A                                 | -                                    | -       | A6578G                                 | T104A                                | 1       | A7020G                                 | D251G                                | 1       |
| A6452G                                 | N62D                                 | 2       | A6636G                                 | Q123R                                | 1       | A7026G                                 | D253G                                | 1       |
| A6453C                                 | N62T                                 | 0       | U6716C                                 | F150L                                | 2       | A7074G                                 | E269G                                | 0       |
| C6454A                                 | N62K                                 | 1       | C6753U                                 | A162V                                | 0       | U7095C                                 | V276A                                | 0       |
|                                        |                                      |         | A6763U                                 | -                                    | -       | G7117A                                 | M283I                                | 2       |
|                                        |                                      |         | G6766A                                 | -                                    | -       | U7137C                                 | L290P                                | -3      |
|                                        |                                      |         | C6767U                                 | P167S                                | 1       | C7142U                                 | P292S                                | 1       |
|                                        |                                      |         | C6767G                                 | P167A                                | 1       | A7148G                                 | I294V                                | 4       |
|                                        |                                      |         |                                        |                                      |         | U7149C                                 | I294T                                | 0       |
|                                        |                                      |         |                                        |                                      |         | A7150G                                 | I294M                                | 2       |
|                                        |                                      |         |                                        |                                      |         | C7152U                                 | P295L                                | -3      |
|                                        |                                      |         |                                        |                                      |         | C7155U                                 | S296L                                | -3      |
|                                        |                                      |         |                                        |                                      |         | A7158G                                 | E297G                                | 0       |
|                                        |                                      |         |                                        |                                      |         | G7159C                                 | E297D                                | 3       |
|                                        |                                      |         |                                        |                                      |         | U7160C                                 | C298R                                | -4      |
|                                        |                                      |         |                                        |                                      |         | A7163G                                 | M299V                                | 2       |
|                                        |                                      |         |                                        |                                      |         | U7164C                                 | M299T                                | -1      |
|                                        |                                      |         |                                        |                                      |         | U7167C                                 | L300P                                | -3      |
|                                        |                                      |         |                                        |                                      |         | G7178A                                 | G304R                                | -3      |
|                                        |                                      |         |                                        |                                      |         | A7207G                                 | -                                    | -       |
|                                        |                                      |         |                                        |                                      |         | A7215G                                 | D316G                                | 1       |
|                                        |                                      |         |                                        |                                      |         | G7240C                                 | -                                    | -       |
| <b>Different mutations<sup>e</sup></b> | <b>6</b>                             |         | <b>Different mutations<sup>e</sup></b> | <b>10</b>                            |         | <b>Different mutations<sup>e</sup></b> | <b>24</b>                            |         |
| <b>Synonymous (%)<sup>f</sup></b>      | <b>2 (33.3)</b>                      |         | <b>Synonymous (%)<sup>f</sup></b>      | <b>2 (20)</b>                        |         | <b>Synonymous (%)<sup>f</sup></b>      | <b>2 (8.3)</b>                       |         |
| <b>Non-synonymous (%)<sup>f</sup></b>  | <b>4 (66.6)</b>                      |         | <b>Non-synonymous (%)<sup>f</sup></b>  | <b>8 (80)</b>                        |         | <b>Non-synonymous (%)<sup>f</sup></b>  | <b>22 (91.6)</b>                     |         |

<sup>a</sup>The population analyzed correspond to passage 3 of the infections described in Fig. 1 and Table 1 of the main text.

<sup>b</sup>The HCV genome residue numbering corresponds to the Jc1-1 genome (accession number #AB047639).

<sup>c</sup>Amino acid residues (single letter code) are numbered from N- to the C-terminus of NS5A.

<sup>d</sup>Mutations (and deduced amino acid substitutions) at the NS4B-coding region.

<sup>e</sup>Number of different mutations found comparing the sequence of each individual clone with the consensus sequence.

<sup>f</sup>Number of different synonymous and non-synonymous mutations; their percentage is indicated in parenthesis.
