# Supplementary material for: Lethal Mutagenesis of Hepatitis C Virus Induced by Favipiravir
Source: PubMed Central journal article supplement (PMC5068784; doi:10.1371/journal.pone.0164691), 2016-10-18
Supplement: pone.0164691.s006.pdf [file pone.0164691.s006.pdf]

**S3 Table.** Mutations, corresponding amino acid substitutions and point accepted mutation (PAM) of the NS5A-coding region in the mutant spectra HCV p0 subjected to three passages in the presence of favipiravir (T-705) 400  $\mu$ M analyzed by ultra deep pyrosequencing<sup>a</sup>.

| Amplicon A1           |                                      |         | Amplicon A2           |                                      |         | Amplicon A4           |                                      |         |
|-----------------------|--------------------------------------|---------|-----------------------|--------------------------------------|---------|-----------------------|--------------------------------------|---------|
| Mutation <sup>b</sup> | Amino acid substitution <sup>c</sup> | PAM 250 | Mutation <sup>b</sup> | Amino acid Substitution <sup>c</sup> | PAM 250 | Mutation <sup>b</sup> | Amino acid Substitution <sup>c</sup> | PAM 250 |
| A6158G <sup>d</sup>   | <b>T225A<sup>d</sup></b>             | 1       | A6452G                | <b>N62D</b>                          | 2       | C6919U                | -                                    | -       |
| G6160A <sup>d</sup>   | -                                    | -       | C6469U                | -                                    | -       | C6942U                | <b>S225F</b>                         | -3      |
| G6166A <sup>d</sup>   | -                                    | -       | C6469A                | -                                    | -       | U6943C                | -                                    | -       |
| U6169C <sup>d</sup>   | -                                    | -       | C6473A                | <b>L69M</b>                          | 4       | C6952U                | -                                    | -       |
| C6187U <sup>d</sup>   | -                                    | -       | G6486A                | <b>R73K</b>                          | 3       | C6955U                | -                                    | -       |
| U6196C <sup>d</sup>   | -                                    | -       | C6505U                | -                                    | -       | G6959U                | <b>V231L</b>                         | 2       |
| C6218U <sup>d</sup>   | -                                    | -       | G6523A                | -                                    | -       | G6974A                | <b>A236T</b>                         | 1       |
| A6220G <sup>d</sup>   | -                                    | -       | G6526A                | -                                    | -       | G6989A                | <b>A241T</b>                         | 1       |
| G6225A <sup>d</sup>   | <b>R247K<sup>d</sup></b>             | 3       | A6527G                | <b>T87A</b>                          | 1       | C6999U                | <b>T244I</b>                         | 0       |
| A6226G <sup>d</sup>   | -                                    | -       | C6529U                | -                                    | -       | A7001G                | <b>T245A</b>                         | 1       |
| A6242G <sup>d</sup>   | <b>I253V<sup>d</sup></b>             | 4       | G6559A                | -                                    | -       | C7003U                | -                                    | -       |
| C6246U <sup>d</sup>   | <b>T254I<sup>d</sup></b>             | 0       | C6562U                | -                                    | -       | G7008A                | <b>S247N</b>                         | 1       |
| G6250A <sup>d</sup>   | -                                    | -       | G6565A                | -                                    | -       | C7015U                | -                                    | -       |
| A6260G <sup>d</sup>   | <b>I259V<sup>d</sup></b>             | 4       | C6575U                | <b>P103S</b>                         | 1       | U7016C                | <b>Y250H</b>                         | 0       |
| C6268U <sup>d</sup>   | -                                    | -       | C6577U                | -                                    | -       | A7020G                | <b>D251G</b>                         | 1       |
| C6298U                | -                                    | -       | A6578G                | <b>T104A</b>                         | 1       | A7026G                | <b>D253G</b>                         | 1       |
| A6319G                | -                                    | -       | A6582G                | <b>N105S</b>                         | 1       | C7033U                | -                                    | -       |
| C6335U                | -                                    | -       | G6625A                | -                                    | -       | A7049G                | <b>M261V</b>                         | 2       |
| G6337A                | -                                    | -       | A6632G                | <b>T122A</b>                         | 1       | A7053C                | <b>E262A</b>                         | 0       |
| A6338G                | <b>T24A</b>                          | 1       | G6637A                | -                                    | -       | G7064A                | <b>A266T</b>                         | 1       |
| A6338U                | <b>T24S</b>                          | 1       | G6646A                | -                                    | -       | G7069A                | -                                    | -       |
| C6340U                | -                                    | -       | A6661G                | -                                    | -       | A7074G                | <b>E269G</b>                         | 0       |
| U6343C                | -                                    | -       | C6665U                | -                                    | -       | G7075A                | -                                    | -       |
| C6373U                | -                                    | -       | U6679C                | -                                    | -       | C7077U                | <b>P270L</b>                         | -3      |
| C6379U                | -                                    | -       | G6682A                | -                                    | -       | G7081A                | -                                    | -       |
| G6410A                | <b>A48T</b>                          | 1       | U6692A                | <b>C142S</b>                         | 0       | U7098C                | <b>L277P</b>                         | -3      |

|        |             |   |
|--------|-------------|---|
| C6411U | <b>A48V</b> | 0 |
| A6452G | <b>N62D</b> | 2 |
| A6453C | <b>N62T</b> | 0 |
| C6454A | <b>N62K</b> | 1 |

|        |              |   |
|--------|--------------|---|
| C6694U | -            | - |
| C6707U | <b>P147S</b> | 1 |
| G6739A | -            | - |
| C6742U | -            | - |
| G6747A | <b>R160K</b> | 3 |
| C6753U | <b>A162V</b> | 0 |
| G6766A | -            | - |
| C6767U | <b>P167S</b> | 1 |

|        |              |    |
|--------|--------------|----|
| U7105C | -            | -  |
| G7111A | -            | -  |
| U7116C | <b>M283T</b> | -1 |
| C7119U | <b>A284V</b> | 0  |
| G7124A | <b>E286K</b> | 0  |
| A7125G | <b>E286G</b> | 0  |
| G7129A | -            | -  |
| G7133A | <b>D289N</b> | 2  |
| A7134G | <b>D289G</b> | 1  |
| U7137C | <b>L290P</b> | -3 |
| G7141A | -            | -  |
| C7142U | <b>P292S</b> | 1  |
| C7144U | -            | -  |
| U7145C | <b>S293P</b> | 1  |
| A7148G | <b>I294V</b> | 4  |
| U7149C | <b>I294T</b> | 0  |
| A7150G | <b>I294M</b> | 2  |
| C7151U | <b>P295S</b> | 1  |
| C7152U | <b>P295L</b> | -3 |
| U7154C | <b>S296P</b> | 1  |
| C7155U | <b>S296L</b> | -3 |
| A7158G | <b>E297G</b> | 0  |
| G7159C | <b>E297D</b> | 3  |
| U7160C | <b>C298R</b> | -4 |
| U7164C | <b>M299T</b> | -1 |
| G7165A | <b>M299I</b> | 2  |
| C7166U | <b>L300F</b> | 2  |
| C7169U | <b>P301S</b> | 1  |
| A7172G | <b>R302G</b> | -3 |
| G7173A | <b>R302K</b> | 3  |
| G7178A | <b>G304R</b> | -3 |
| G7179A | <b>G304E</b> | 0  |

|                                        |                |                                        |                  |                                        |                  |   |
|----------------------------------------|----------------|----------------------------------------|------------------|----------------------------------------|------------------|---|
|                                        |                |                                        |                  | U7183C                                 | -                | - |
|                                        |                |                                        |                  | A7215G                                 | <b>D316G</b>     | 1 |
|                                        |                |                                        |                  | U7217C                                 | <b>Y317H</b>     | 0 |
|                                        |                |                                        |                  | A7218G                                 | <b>Y317C</b>     | 0 |
|                                        |                |                                        |                  | G7225A                                 | -                | - |
|                                        |                |                                        |                  | G7240C                                 | -                | - |
| <b>Different mutations<sup>e</sup></b> | <b>30</b>      | <b>Different mutations<sup>e</sup></b> | <b>34</b>        | <b>Different mutations<sup>e</sup></b> | <b>64</b>        |   |
| <b>Synonymous (%)<sup>f</sup></b>      | <b>18 (60)</b> | <b>Synonymous (%)<sup>f</sup></b>      | <b>21 (61.8)</b> | <b>Synonymous (%)<sup>f</sup></b>      | <b>18 (28.1)</b> |   |
| <b>Non-synonymous (%)<sup>f</sup></b>  | <b>12 (40)</b> | <b>Non-synonymous (%)<sup>f</sup></b>  | <b>13 (38.2)</b> | <b>Non-synonymous (%)<sup>f</sup></b>  | <b>46 (71.9)</b> |   |

<sup>a</sup>The population analyzed correspond to passage 3 of the infections described in Fig. 1 and Table 1 of the main text.

<sup>b</sup>The HCV genome residue numbering corresponds to the JFH-1 genome (accession number #AB047639).

<sup>c</sup>Amino acid residues (single letter code) are numbered from N- to the C-terminus of NS5A.

<sup>d</sup>Mutations (and deduced amino acid substitutions) at the NS4B-coding region.

<sup>e</sup>Number of different mutations found comparing the sequence of each individual clone with the consensus sequence.

<sup>f</sup>Number of different synonymous and non-synonymous mutations; their percentage is indicated in parenthesis.
