# Supplementary material for: Lethal Mutagenesis of Hepatitis C Virus Induced by Favipiravir
Source: PubMed Central journal article supplement (PMC5068784; doi:10.1371/journal.pone.0164691), 2016-10-18
Supplement: pone.0164691.s007.pdf [file pone.0164691.s007.pdf]

**S4 Table.** Mutations, corresponding amino acid and point accepted mutation (PAM) of the NS5B-coding region in the mutant spectra HCV p0 subjected to three passages in the absence or presence of 400  $\mu$ M favipiravir (T-705)<sup>a</sup>

| No drug               |                                      |         | 400 $\mu$ M favipiravir |                                      |         |
|-----------------------|--------------------------------------|---------|-------------------------|--------------------------------------|---------|
| Mutation <sup>b</sup> | Amino acid substitution <sup>c</sup> | PAM 250 | Mutation <sup>b</sup>   | Amino acid substitution <sup>c</sup> | PAM 250 |
| C7703U                | <b>P13S</b>                          | 1       | G 7690A                 | -                                    | -       |
| G7782A                | <b>C39Y</b>                          | 0       | C 7705U                 | -                                    | -       |
| A7792U                | -                                    | -       | G 7710A                 | <b>S15N</b>                          | 1       |
| U7967C                | <b>Y101H</b>                         | 0       | G 7721A                 | <b>E19K</b>                          | 0       |
| A7983C                | <b>K106T</b>                         | 0       | C 7735U                 | -                                    | -       |
| U8125C                | -                                    | -       | G 7756A                 | -                                    | -       |
| U8279C                | -                                    | -       | G 7843A                 | -                                    | -       |
| A8626G                | -                                    | -       | U 7845C                 | <b>L60P</b>                          | -3      |
| C8679U                | <b>A338V</b>                         | 0       | G 7873A                 | -                                    | -       |
| U8716C                | -                                    | -       | A 7875G                 | <b>D70G</b>                          | 1       |
| A8752G                | -                                    | -       | C 7903U                 | -                                    | -       |
| G9118A                | -                                    | -       | A 7945G                 | -                                    | -       |
| U9162C                | <b>V499A</b>                         | 0       | C 7981U                 | -                                    | -       |
| G9163U                | -                                    | -       | G 7987A                 | -                                    | -       |
| G9256A                | -                                    | -       | G 8007A                 | <b>R114K</b>                         | 3       |
| U9305A                | <b>L547I</b>                         | 2       | G 8008A                 | -                                    | -       |
| C9373U                | -                                    | -       | U 8013C                 | <b>V116A</b>                         | 0       |
|                       |                                      |         | G 8108A                 | <b>D148N</b>                         | 2       |
|                       |                                      |         | G 8120U                 | <b>G152W</b>                         | -7      |
|                       |                                      |         | C 8173U                 | -                                    | -       |
|                       |                                      |         | G 8186A                 | <b>A174T</b>                         | 1       |
|                       |                                      |         | G 8218A                 | -                                    | -       |
|                       |                                      |         | G 8222A                 | <b>V186I</b>                         | 4       |
|                       |                                      |         | C 8235U                 | <b>S190F</b>                         | -3      |
|                       |                                      |         | A 8263C                 | <b>Q199H</b>                         | 3       |
|                       |                                      |         | C 8278U                 | -                                    | -       |
|                       |                                      |         | G 8405A                 | <b>E247K</b>                         | 0       |
|                       |                                      |         | C 8503U                 | -                                    | -       |
|                       |                                      |         | A 8560G                 | -                                    | -       |
|                       |                                      |         | C 8572U (x 2)           | -                                    | -       |
|                       |                                      |         | C 8580U                 | <b>A305V</b>                         | 0       |
|                       |                                      |         | A 8588G                 | <b>I308V</b>                         | 4       |

|                                        |                  |                                        |                  |    |
|----------------------------------------|------------------|----------------------------------------|------------------|----|
|                                        |                  | A 8600G                                | <b>T312A</b>     | 1  |
|                                        |                  | A 8633G                                | <b>I323V</b>     | 4  |
|                                        |                  | C 8715A                                | <b>P350H</b>     | 0  |
|                                        |                  | C 8723U                                | <b>P353S</b>     | 1  |
|                                        |                  | C 8724U                                | <b>P353L</b>     | -3 |
|                                        |                  | C 8725U                                | -                | -  |
|                                        |                  | C 8767U                                | -                | -  |
|                                        |                  | C 8791U                                | -                | -  |
|                                        |                  | G 8808A (x 2)                          | <b>R381K</b>     | 3  |
|                                        |                  | C 8812U                                | -                | -  |
|                                        |                  | C 8835U                                | <b>T390I</b>     | 0  |
|                                        |                  | C 8854U                                | -                | -  |
|                                        |                  | U 8873A                                | <b>S403T</b>     | 1  |
|                                        |                  | A 8887G                                | -                | -  |
|                                        |                  | C 8891U                                | -                | -  |
|                                        |                  | A 8918G                                | <b>T418A</b>     | 1  |
|                                        |                  | C 8930U                                | <b>R422C</b>     | -4 |
|                                        |                  | C 8939U                                | -                | -  |
|                                        |                  | C 8971U                                | -                | -  |
|                                        |                  | G 8989A                                | -                | -  |
|                                        |                  | A 9013G                                | -                | -  |
|                                        |                  | A 9019G                                | -                | -  |
|                                        |                  | C 9022U                                | -                | -  |
|                                        |                  | C 9033U                                | <b>P456L</b>     | -3 |
|                                        |                  | A 9053G                                | <b>I463V</b>     | 4  |
|                                        |                  | G 9070A                                | -                | -  |
|                                        |                  | U 9162C                                | <b>V499A</b>     | 0  |
|                                        |                  | A 9307G                                | -                | -  |
|                                        |                  | G 9323A                                | <b>V553I</b>     | 4  |
|                                        |                  | C 9331U                                | -                | -  |
|                                        |                  | A 9382G                                | -                | -  |
|                                        |                  | C 9397U                                | -                | -  |
|                                        |                  | C 9418U                                | -                | -  |
|                                        |                  | C 9419U                                | <b>L585F</b>     | 2  |
|                                        |                  | G 9434A                                | <b>A590T</b>     | 1  |
|                                        |                  | G 9439A                                | -                | -  |
|                                        |                  | G 9442A                                | -                | -  |
| <b>Different mutations<sup>d</sup></b> | <b>17</b>        | <b>Different mutations<sup>d</sup></b> | <b>69</b>        |    |
| <b>Synonymous (%)<sup>e</sup></b>      | <b>10 (58.8)</b> | <b>Synonymous (%)<sup>e</sup></b>      | <b>38 (55.1)</b> |    |
| <b>Non-synonymous (%)<sup>e</sup></b>  | <b>7 (41.2)</b>  | <b>Non-synonymous(%)<sup>e</sup></b>   | <b>31 (44.9)</b> |    |

<sup>a</sup>The population analyzed correspond to passage 3 of the infections described in Fig. 1 and Table 2 of the main text.

<sup>b</sup>The HCV genome residue numbering corresponds to the JFH-1 genome (accession number #AB047639).

<sup>c</sup>Amino acid residues (single letter code) are numbered from N- to the C-terminus of NS5B.

<sup>d</sup>Data represent the total number of different mutations found by comparing the sequence of each individual clone with the consensus sequence.

<sup>e</sup>Number of different synonymous and non-synonymous mutations; their percentage is indicated in parenthesis.
